# Supplementary material for: Sex differences in neuropsychiatric symptoms in Alzheimer’s disease dementia: a meta-analysis
Source: Springer Nature journal article supplement (doi:10.1186/s13195-022-00991-z), 2022-04-04
Supplement: MOESM1 [file 20282140]

# **Sex differences in neuropsychiatric symptoms in Alzheimer's disease: A meta-analysis**

Willem S. Eikelboom<sup>a\*</sup>, Michel Pan<sup>a</sup>, Rik Ossenkoppele<sup>b,c</sup>, Michiel Coesmans<sup>d</sup>, Jennifer R. Gatchel<sup>e,f</sup>, Zahinoor Ismail<sup>g</sup>, Krista L. Lanctôt<sup>h,i</sup>, Corinne E. Fischer<sup>j,k</sup>, Moyra E. Mortby<sup>l,m</sup>, Esther van den Berg<sup>a</sup>, Janne M. Papma<sup>a</sup>

<sup>a</sup> Department of Neurology and Alzheimer center Erasmus MC, Erasmus MC, University Medical Center, PO Box 2040, 3000 CA, Rotterdam, the Netherlands

<sup>b</sup> Department of Neurology, Alzheimer Center Amsterdam, Amsterdam University Medical Center, PO Box 7057, 1007 MB, Amsterdam, the Netherlands

<sup>c</sup> Clinical Memory Research Unit, Lund University, Simrisbanvägen 14, 212 24, Malmö, Sweden

<sup>d</sup> Department of Psychiatry, Erasmus MC, University Medical Center, PO Box 2040, 3000 CA, Rotterdam, the Netherlands

<sup>e</sup> Division of Geriatric Psychiatry, McLean Hospital, Harvard Medical School, 115 Mill St, Belmont, MA 02478, Belmont, Massachusetts, USA

<sup>f</sup> Department of Psychiatry, Massachusetts General Hospital, Harvard Medical School, 25 Shattuck St, Boston, MA 02115, Boston, Massachusetts, USA

<sup>g</sup> Departments of Psychiatry, Clinical Neurosciences, and Community Health Sciences, Hotchkiss Brain Institute, University of Calgary, 3330 Hospital Dr NW, AB T2N 4N1, Calgary, Alberta, Canada

<sup>h</sup> Department of Psychiatry, University of Toronto, 27 King's College Cir, ON M5S 1A1, Toronto, Canada

<sup>i</sup> Hurvitz Brain Sciences Research, Sunnybrook Health Sciences Centre, Wellness Way, ON M4N 3M5, Toronto, Canada

<sup>j</sup> Keenan Research Centre for Biomedical Science, St. Michael's Hospital, 36 Queen St E, ON M5B 1W8, Toronto, Canada

<sup>k</sup> School of Psychology, University of New South Wales, Kensington NSW 2052, Australia

<sup>l</sup> Neuroscience Research Australia, Sydney, 139 Barker St, Randwick NSW 2031, Australia

## **Supplemental materials**

eTable 1. **Search strategy literature search**

eTable 2. **Study quality assessment**

eTable 3. **Characteristics of included studies**

eTable 4. **Meta-regression analyses prevalence specific NPS**

eTable 5. **Meta-regression analyses severity specific NPS**

eTable 6. **Publication bias measures for all meta-analyses**

eTable 7. **Duval and Tweedie's trim-and-fill method to adjust for publication bias**

eTable 8. **Sex differences in the prevalence NPS for meta-analyses that excluded outliers**

eTable 9. **Sex differences in the severity of NPS for meta-analyses that excluded outliers**

eFigure 1. **Forest plots for meta-analyses prevalence specific NPS**

eFigure 2. **Forest plots for meta-analyses severity specific NPS**

eFigure 3. **Funnel plots for meta-analyses prevalence specific NPS**

eFigure 4. **Funnel plots for meta-analyses severity specific NPS**

**eReferences**

## eTable 1 Search strategy literature search.

|                                                                                                                                                                                                                                                                                                                                                                                                                                                                                                                                                                                                                                                                                                                                                                                                                                                                                                                                                                                                                                                                                           |
|-------------------------------------------------------------------------------------------------------------------------------------------------------------------------------------------------------------------------------------------------------------------------------------------------------------------------------------------------------------------------------------------------------------------------------------------------------------------------------------------------------------------------------------------------------------------------------------------------------------------------------------------------------------------------------------------------------------------------------------------------------------------------------------------------------------------------------------------------------------------------------------------------------------------------------------------------------------------------------------------------------------------------------------------------------------------------------------------|
| <p><i>Embase.com – inception until February 12, 2021</i></p> <p>('behavior'/de OR 'neuropsychiatry'/de OR 'neuropsychiatric inventory'/de OR 'apathy'/de OR 'agitation'/de OR 'restlessness'/de OR 'sleep'/exp OR 'aggression'/de OR 'anxiety'/de OR 'depression'/de OR 'delusion'/de OR 'hallucination'/de OR 'eating'/de OR 'euphoria'/de OR 'irritability'/de OR (((neuropsychiatr*) NEAR/3 (symptom* OR inventor*)) OR NPS OR apath* OR agitat* OR sleep* OR aggress* OR anxiet* OR anxious* OR depress* OR delus* OR hallucinat* OR eat* OR euphor* OR disinhibit* OR irritabilit* OR (irritable NEAR/3 mood*) OR ((aberrant*) NEAR/3 (motor*) NEAR/3 (behavior* OR behaviour*)) OR ((mild*) NEAR/3 (behav*) NEAR/3 (impairment*)) OR MBI OR BPSD):ab,ti,kw) AND ('Alzheimer disease'/de OR (Alzheimer* OR Alzeimer*):ab,ti,kw) AND ('gender and sex'/exp OR 'sex ratio'/de OR ((gender* OR sex*) NEAR/3 (differ* OR specific* OR factor* OR characterist* OR ratio*)):ab,ti,kw) NOT ((animal/exp OR animal*:de OR nonhuman/de) NOT ('human'/exp)) NOT [conference abstract]/lim</p> |
| <p><i>Medline ALL/PubMed – inception until February 12, 2021</i></p> <p>(Behavior/ OR Neuropsychiatry/ OR Apathy/ OR Psychomotor Agitation/ OR Sleep/ OR Aggression/ OR Anxiety/ OR Depression/ OR Delusions/ OR Hallucinations/ OR Eating/ OR Euphoria/ OR Irritable Mood/ OR (((neuropsychiatr*) ADJ3 (symptom* OR inventor*)) OR NPS OR apath* OR agitat* OR sleep* OR aggress* OR anxiet* OR anxious* OR depress* OR delus* OR hallucinat* OR eat* OR euphor* OR disinhibit* OR irritabilit* OR ((aberrant*) ADJ3 (motor*) ADJ3 (behavior* OR behaviour*)) OR ((mild*) ADJ3 (behav*) ADJ3 (impairment*)) OR MBI OR BPSD).ab,ti,kf.) AND (Alzheimer Disease/ OR (Alzheimer* OR Alzeimer*):ab,ti,kf.) AND (Sex Characteristics/ OR Sex/ OR Sex Factors/ OR exp Sex Distribution/ OR Sex Differentiation/ OR Gender Identity/ OR ((gender* OR sex*) ADJ3 (differ* OR specific* OR factor* OR characterist*)):ab,ti,kf.) NOT (exp animals/ NOT humans/) NOT (letter* OR news OR comment* OR editorial* OR congres* OR abstract* OR book* OR chapter* OR dissertation abstract*).pt.</p>   |
| <p><i>Web of Science – inception until February 12, 2021</i></p> <p>TS=(((neuropsychiatr*) NEAR/2 (symptom* OR inventor*)) OR NPS OR apath* OR agitat* OR sleep* OR aggress* OR anxiet* OR anxious* OR depress* OR delus* OR hallucinat* OR eat* OR euphor* OR disinhibit* OR irritabilit* OR (irritable NEAR/2 mood*) OR ((aberrant*) NEAR/2 (motor*) NEAR/2 (behavior* OR behaviour*)) OR ((mild*) NEAR/2 (behav*) NEAR/2 (impairment*)) OR MBI OR BPSD)) AND ((Alzheimer* OR Alzeimer*)) AND (((gender* OR sex*) NEAR/2 (differ* OR specific* OR factor* OR characterist* OR ratio*))) NOT ((animal* OR rat OR rats OR mouse OR mice OR murine OR dog OR dogs OR canine OR cat OR cats OR feline OR rabbit OR cow OR cows OR bovine OR rodent* OR sheep OR ovine OR pig OR swine OR porcine OR veterinar* OR chick* OR zebrafish* OR baboon* OR nonhuman* OR primate* OR cattle* OR goose OR geese OR duck OR macaque* OR avian* OR bird* OR fish*) NOT (human* OR patient* OR women OR woman OR men OR man))) AND DT=(Article)</p>                                                    |
| <p><i>Cochrane Central Register of Controlled Trials – inception until February 12, 2021</i></p> <p>(((neuropsychiatr*) NEAR/3 (symptom* OR inventor*)) OR NPS OR apath* OR agitat* OR sleep* OR aggress* OR anxiet* OR anxious* OR depress* OR delus* OR hallucinat* OR eat* OR euphor* OR disinhibit* OR irritabilit* OR (irritable NEAR/3 mood*) OR ((aberrant*) NEAR/3 (motor*) NEAR/3 (behavior* OR behaviour*)) OR ((mild*) NEAR/3 (behav*) NEAR/3 (impairment*)) OR MBI OR BPSD):ab,ti,kw) AND ((Alzheimer* OR Alzeimer*):ab,ti,kw) AND (((gender* OR sex*) NEAR/3 (differ* OR specific* OR factor* OR characterist* OR ratio*)):ab,ti,kw)</p>                                                                                                                                                                                                                                                                                                                                                                                                                                     |
| <p><i>PsycINFO – inception until February 12, 2021</i></p> <p>(Behavior/ OR Neuropsychiatry/ OR Apathy/ OR Agitation/ OR Sleep/ OR Aggressiveness/ OR Anxiety/ OR "Depression (Emotion) "/ OR Delusions/ OR Hallucinations/ OR Eating Behavior/ OR Euphoria/ OR Irritability/ OR (((neuropsychiatr*) ADJ3 (symptom* OR inventor*)) OR NPS OR apath* OR agitat* OR sleep* OR aggress* OR anxiet* OR anxious* OR depress* OR delus* OR hallucinat* OR eat* OR euphor* OR disinhibit* OR irritabilit* OR ((aberrant*) ADJ3 (motor*) ADJ3 (behavior* OR behaviour*)) OR ((mild*) ADJ3 (behav*) ADJ3 (impairment*)) OR MBI OR BPSD).ab,ti.) AND ("Alzheimer's Disease"/ OR (Alzheimer* OR Alzeimer*):ab,ti.) AND (Human Sex Differences/ OR Sex/ OR Gender Identity/ OR ((gender* OR sex*) ADJ3 (differ* OR specific* OR factor* OR characterist*)):ab,ti.) NOT ((animal.po. OR exp animals/) NOT human.po.) NOT (letter* OR news OR comment* OR editorial* OR congres* OR abstract* OR book* OR chapter* OR dissertation abstract*).pt.</p>                                                   |
| <p><i>Google Scholar – top 200 relevant references</i></p> <p>“gender sex difference differences factor ratio” “neuropsychiatric symptoms” apathy agitation sleep aggression anxiety depression delusion hallucination eating euphoria disinhibition irritability Alzheimer</p>                                                                                                                                                                                                                                                                                                                                                                                                                                                                                                                                                                                                                                                                                                                                                                                                           |

**eTable 2. Study quality assessment according to Quality Assessment Tool for Observational Cohort and Cross-Sectional Studies**

| <b>Author, year</b>                      | <b>1</b> | <b>2</b> | <b>3</b> | <b>4</b> | <b>5</b> | <b>6</b> | <b>7</b> | <b>8</b> | <b>9</b> | <b>10</b> | <b>11</b> | <b>12</b> | <b>13</b> | <b>14</b> | <b>Overall quality</b> |
|------------------------------------------|----------|----------|----------|----------|----------|----------|----------|----------|----------|-----------|-----------|-----------|-----------|-----------|------------------------|
| Alberici et al., 2008 <sup>1</sup>       | Yes      | No       | NR       | NR       | No       | NA       | NA       | NA       | No       | NA        | Yes       | NA        | NA        | NA        | Poor                   |
| Álvarez et al., 2014 <sup>2</sup>        | Yes      | No       | NR       | Yes      | No       | NA       | NA       | NA       | No       | NA        | Yes       | NA        | NA        | NA        | Fair                   |
| Benoit et al., 2008 <sup>3</sup>         | Yes      | No       | NR       | Yes      | No       | NA       | NA       | NA       | No       | NA        | Yes       | NA        | NA        | NA        | Fair                   |
| Bliwise et al., 2011 <sup>4</sup>        | Yes      | Yes      | Yes      | Yes      | No       | NA       | NA       | NA       | No       | NA        | Yes       | NA        | NA        | NA        | Fair                   |
| Burns et al., 1990a <sup>5</sup>         | No       | Yes      | Yes      | No       | No       | NA       | NA       | NA       | No       | NA        | Yes       | NA        | NA        | NA        | Poor                   |
| Burns et al., 1990b <sup>6</sup>         | No       | Yes      | NR       | No       | No       | NA       | NA       | NA       | No       | NA        | Yes       | NA        | NA        | NA        | Poor                   |
| Chang et al., 2020 <sup>7</sup>          | Yes      | No       | NR       | No       | Yes      | NA       | NA       | NA       | No       | NA        | Yes       | NA        | NA        | NA        | Fair                   |
| Chareernboon et al., 2014 <sup>8</sup>   | Yes      | Yes      | NR       | No       | No       | NA       | NA       | NA       | No       | NA        | Yes       | NA        | NA        | NA        | Fair                   |
| Chiu et al., 2012 <sup>9</sup>           | Yes      | Yes      | NR       | Yes      | No       | NA       | NA       | NA       | No       | NA        | Yes       | NA        | NA        | NA        | Fair                   |
| Colombo et al., 2018 <sup>10</sup>       | Yes      | No       | Yes      | Yes      | No       | NA       | NA       | NA       | No       | NA        | Yes       | NA        | NA        | NA        | Fair                   |
| Connors et al., 2018 <sup>11</sup>       | Yes      | Yes      | Yes      | Yes      | No       | NA       | NA       | NA       | No       | NA        | Yes       | NA        | NA        | NA        | Good                   |
| Del Prete et al., 2009 <sup>12</sup>     | Yes      | Yes      | NR       | Yes      | No       | NA       | NA       | NA       | No       | NA        | Yes       | NA        | NA        | NA        | Fair                   |
| Delano-Wood et al., 2008 <sup>13</sup>   | Yes      | No       | NR       | Yes      | No       | NA       | NA       | NA       | No       | NA        | Yes       | NA        | NA        | NA        | Fair                   |
| Derouesné et al., 1996 <sup>14</sup>     | Yes      | Yes      | NR       | Yes      | No       | NA       | NA       | NA       | No       | NA        | Yes       | NA        | NA        | NA        | Fair                   |
| Eustace et al., 2001 <sup>15</sup>       | Yes      | No       | NR       | Yes      | No       | NA       | NA       | NA       | No       | NA        | Yes       | NA        | NA        | NA        | Fair                   |
| Finger et al., 2017 <sup>16</sup>        | Yes      | Yes      | NR       | Yes      | No       | NA       | NA       | NA       | No       | NA        | Yes       | NA        | NA        | NA        | Fair                   |
| Gomez-Gallego et al., 2020 <sup>17</sup> | Yes      | No       | NR       | Yes      | No       | NA       | NA       | NA       | No       | NA        | Yes       | NA        | NA        | NA        | Fair                   |
| Gormley et al., 1998a <sup>18</sup>      | Yes      | Yes      | NR       | Yes      | No       | NA       | NA       | NA       | No       | NA        | Yes       | NA        | NA        | NA        | Fair                   |
| Gormley et al., 1998b <sup>19</sup>      | Yes      | Yes      | NR       | Yes      | No       | NA       | NA       | NA       | No       | NA        | Yes       | NA        | NA        | NA        | Fair                   |
| Hall et al., 2014 <sup>20</sup>          | Yes      | No       | NR       | Yes      | No       | NA       | NA       | NA       | No       | NA        | Yes       | NA        | NA        | NA        | Fair                   |
| Ikezaki et al., 2020 <sup>21</sup>       | Yes      | Yes      | NR       | Yes      | No       | NA       | NA       | NA       | No       | NA        | Yes       | NA        | NA        | NA        | Fair                   |
| Hsieh et al., 2019 <sup>22</sup>         | Yes      | Yes      | NR       | No       | No       | NA       | NA       | NA       | No       | NA        | Yes       | NA        | NA        | NA        | Fair                   |
| Kabeshita et al., 2016 <sup>23</sup>     | Yes      | Yes      | Yes      | Yes      | Yes      | NA       | NA       | NA       | No       | NA        | Yes       | NA        | NA        | NA        | Good                   |
| Kaiser et al., 2014 <sup>24</sup>        | Yes      | No       | NR       | Yes      | No       | NA       | NA       | NA       | No       | NA        | Yes       | NA        | NA        | NA        | Fair                   |
| Karttunen et al. 2011 <sup>25</sup>      | Yes      | Yes      | NR       | Yes      | No       | NA       | NA       | NA       | No       | NA        | Yes       | NA        | NA        | NA        | Fair                   |
| Kaufer et al., 1998 <sup>26</sup>        | Yes      | No       | NR       | Yes      | No       | NA       | NA       | NA       | No       | NA        | Yes       | NA        | NA        | NA        | Fair                   |
| Kwak et al., 2013 <sup>27</sup>          | Yes      | Yes      | Yes      | Yes      | No       | NA       | NA       | NA       | No       | NA        | Yes       | NA        | NA        | NA        | Good                   |
| Landes et al., 2005 <sup>28</sup>        | Yes      | No       | NR       | Yes      | No       | NA       | NA       | NA       | No       | NA        | Yes       | NA        | NA        | NA        | Fair                   |
| Lee et al., 2017 <sup>29</sup>           | Yes      | Yes      | NR       | Yes      | No       | NA       | NA       | NA       | No       | NA        | Yes       | NA        | NA        | NA        | Fair                   |
| Leroi et al., 2003 <sup>30</sup>         | Yes      | Yes      | NR       | Yes      | No       | NA       | NA       | NA       | No       | NA        | Yes       | NA        | NA        | NA        | Fair                   |
| Levy et al., 1996 <sup>31</sup>          | Yes      | No       | NR       | Yes      | No       | NA       | NA       | NA       | No       | NA        | Yes       | NA        | NA        | NA        | Fair                   |
| Linszen et al., 2018 <sup>32</sup>       | Yes      | Yes      | Yes      | Yes      | No       | NA       | NA       | NA       | No       | NA        | Yes       | NA        | NA        | NA        | Good                   |

| Author, year                              | 1   | 2   | 3   | 4   | 5   | 6  | 7  | 8  | 9  | 10 | 11  | 12 | 13 | 14 | Overall quality |
|-------------------------------------------|-----|-----|-----|-----|-----|----|----|----|----|----|-----|----|----|----|-----------------|
| Liu et al., 1999 <sup>33</sup>            | Yes | Yes | Yes | No  | No  | NA | NA | NA | No | NA | Yes | NA | NA | NA | Fair            |
| Matsuoka et al., 2018 <sup>34</sup>       | Yes | Yes | NR  | Yes | No  | NA | NA | NA | No | NA | Yes | NA | NA | NA | Fair            |
| Migliorelli et al., 1995 <sup>35</sup>    | Yes | Yes | Yes | Yes | No  | NA | NA | NA | No | NA | Yes | NA | NA | NA | Good            |
| Moran M. et al., 2005 <sup>36</sup>       | Yes | No  | NR  | Yes | No  | NA | NA | NA | No | NA | Yes | NA | NA | NA | Fair            |
| Moran E.K. et al., 2008 <sup>37</sup>     | Yes | No  | NR  | Yes | No  | NA | NA | NA | No | NA | Yes | NA | NA | NA | Fair            |
| Müller-Thomsen et al., 2002 <sup>38</sup> | Yes | No  | NR  | No  | No  | NA | NA | NA | No | NA | Yes | NA | NA | NA | Poor            |
| Mulin et al., 2011 <sup>39</sup>          | Yes | No  | Yes | Yes | No  | NA | NA | NA | No | NA | Yes | NA | NA | NA | Fair            |
| de Oliveira et al., 2017 <sup>40</sup>    | Yes | Yes | NR  | Yes | No  | NA | NA | NA | No | NA | Yes | NA | NA | NA | Fair            |
| Ott et al., 1996 <sup>41</sup>            | Yes | No  | NR  | Yes | No  | NA | NA | NA | No | NA | Yes | NA | NA | NA | Fair            |
| Porta-Etessam et al., 2011 <sup>42</sup>  | Yes | No  | Yes | Yes | Yes | NA | NA | NA | No | NA | Yes | NA | NA | NA | Good            |
| Pusswald et al., 2015 <sup>43</sup>       | Yes | Yes | Yes | Yes | No  | NA | NA | NA | No | NA | Yes | NA | NA | NA | Good            |
| Rozzini et al., 2007 <sup>44</sup>        | Yes | Yes | Yes | No  | No  | NA | NA | NA | No | NA | Yes | NA | NA | NA | Fair            |
| Shi et al., 2020 <sup>45</sup>            | Yes | Yes | NR  | Yes | No  | NA | NA | NA | No | NA | Yes | NA | NA | NA | Fair            |
| Senanarong et al., 2004 <sup>46</sup>     | Yes | No  | NR  | Yes | Yes | NA | NA | NA | No | NA | Yes | NA | NA | NA | Fair            |
| Sinforiani et al., 2010 <sup>47</sup>     | Yes | Yes | NR  | Yes | No  | NA | NA | NA | No | NA | Yes | NA | NA | NA | Fair            |
| Slifer et al., 2009 <sup>48</sup>         | Yes | No  | NR  | No  | No  | NA | NA | NA | No | NA | Yes | NA | NA | NA | Poor            |
| Spalletta et al., 2010 <sup>49</sup>      | Yes | Yes | NR  | Yes | No  | NA | NA | NA | No | NA | Yes | NA | NA | NA | Fair            |
| Steffens et al., 2005 <sup>50</sup>       | Yes | Yes | NR  | Yes | No  | NA | NA | NA | No | NA | Yes | NA | NA | NA | Fair            |
| Suma et al., 2018 <sup>51</sup>           | Yes | Yes | Yes | Yes | No  | NA | NA | NA | No | NA | Yes | NA | NA | NA | Good            |
| Toyota et al., 2007 <sup>52</sup>         | Yes | Yes | Yes | Yes | No  | NA | NA | NA | No | NA | Yes | NA | NA | NA | Good            |
| Treiber et al., 2008 <sup>53</sup>        | Yes | Yes | NR  | Yes | No  | NA | NA | NA | No | NA | Yes | NA | NA | NA | Fair            |
| Troisi et al., 1996 <sup>54</sup>         | Yes | No  | NR  | No  | No  | NA | NA | NA | No | NA | Yes | NA | NA | NA | Poor            |
| Tunnard et al., 2010 <sup>55</sup>        | Yes | No  | NR  | Yes | No  | NA | NA | NA | No | NA | Yes | NA | NA | NA | Fair            |
| Usman et al., 2010 <sup>56</sup>          | Yes | Yes | Yes | No  | No  | NA | NA | NA | No | NA | Yes | NA | NA | NA | Fair            |
| Vilalta-Franch et al., 2013 <sup>57</sup> | Yes | Yes | NR  | Yes | No  | NA | NA | NA | No | NA | Yes | NA | NA | NA | Fair            |
| Xing et al., 2015 <sup>58</sup>           | Yes | No  | NR  | No  | No  | NA | NA | NA | No | NA | Yes | NA | NA | NA | Poor            |
| Yang et al., 2017 <sup>59</sup>           | Yes | Yes | NR  | Yes | No  | NA | NA | NA | No | NA | Yes | NA | NA | NA | Fair            |
| Yang et al., 2020 <sup>60</sup>           | Yes | Yes | NR  | Yes | No  | NA | NA | NA | No | NA | Yes | NA | NA | NA | Fair            |
| Zeitzer et al., 2014 <sup>61</sup>        | Yes | No  | NR  | Yes | No  | NA | NA | NA | No | NA | Yes | NA | NA | NA | Fair            |
| Zhao et al., 2012 <sup>62</sup>           | No  | No  | NR  | Yes | No  | NA | NA | NA | No | NA | Yes | NA | NA | NA | Poor            |

Abbreviations: NR, not reported; NA, not applicable.

**eTable 3. Characteristics of included studies**

| Study                                 | Country  | Sample            | N total  | N (%) females | N (%) males   | Age M (SD)              | Education M (SD)    | MMSE M (SD) | Disease duration M (SD) | % APOE-ε4 carriers | NPS                       | Outcome measure                 |
|---------------------------------------|----------|-------------------|----------|---------------|---------------|-------------------------|---------------------|-------------|-------------------------|--------------------|---------------------------|---------------------------------|
| Alberici et al., 2008 <sup>1</sup>    | Italy    | NR                | 25       | 16 (64.0 %)   | 9 (36.0 %)    | 79.2 (7.2)              | NR                  | 16.0 (7.8)  | NR                      | NR                 | Total score               | NPI                             |
| Álvarez et al., 2014 <sup>2</sup>     | Spain    | Memory clinic     | 250      | 194 (77.6 %)  | 56 (22.4 %)   | 75.0 (7.4)              | NR                  | 17.5 (4.1)  | NR                      | 47.2%              | Apathy                    | NPI-item >0                     |
| Benoit et al., 2008 <sup>3</sup>      | France   | Memory clinic     | 684      | 487 (71.0%)   | 197 (28.7%)   | 77.9 (6.8)              | NR                  | 20.0 (4.23) | 1.1 (1.1)               | NR                 | Apathy, depression        | NPI-items >0                    |
| Bliwise et al., 2011 <sup>4</sup>     | USA      | Memory clinic     | 4192     | 2,387 (56.9%) | 1,805 (43.1%) | 76.2 (9.4)              | >College 57.5%      | 21.6 (15.0) | NR                      | NR                 | Night-time behaviors      | NPI-Q-item >0                   |
| Burns et al., 1990a <sup>5</sup>      | UK       | Memory clinic, NH | 174      | 139 (79.9%)   | 35 (20.1%)    | 80.5 (6.6)              | NR                  | NR          | NR                      | NR                 | Depression                | GMSS >0                         |
| Burns et al., 1990b <sup>6</sup>      | UK       | Memory clinic, NH | 178      | 141 (79.2%)   | 37 (20.8%)    | 80.5 (6.6)              | NR                  | NR          | NR                      | NR                 | Aggression                | SGRC >0                         |
| Chang et al., 2020 <sup>7</sup>       | Taiwan   | Memory clinic     | 463      | 259 (55,9%)   | 204 (44,1%)   | 70.4 (7.7)              | 7.1 (4.9)           | 18.5 (7.3)  | NR                      | 30.2%              | Total score, 12 NPI-items | NPI severity x frequency scores |
| Charernboon et al., 2014 <sup>8</sup> | Thailand | Memory clinic     | 62       | 39 (62.9%)    | 23 (37.1%)    | 76.0 (6.7)              | NR                  | 18.3 (5.9)  | NR                      | NR                 | No. NPS                   | NPI                             |
| Chiu et al., 2012 <sup>9</sup>        | Taiwan   | Memory clinic     | 302      | 203 (67.2%)   | 99 (32.8%)    | 76.8 (8.8)              | 5.0 (4.6)           | 15.3 (8.3)  | 2.7 (2.5)               | NR                 | Depression                | NIMH-dAD diagnosis              |
| Colombo et al., 2018 <sup>10</sup>    | Italy    | Memory clinic     | 221 mild | 108 (48.9%)   | 113 (51.1%)   | 76.4 (7.0) <sup>a</sup> | ≥High School 41.8%  | Range 18–26 | NR                      | NR                 | 12 NPI-items              | NPI-items >0                    |
| Colombo et al., 2018 <sup>10</sup>    | Italy    | Memory clinic     | 254 mod. | 166 (65.4%)   | 88 (34.7%)    | 76.4 (7.0) <sup>a</sup> | ≥ High School 41.8% | Range 10–17 | NR                      | NR                 | 12 NPI-items              | NPI-items >0                    |

| Study                                    | Country   | Sample                          | N total | N (%) females | N (%) males  | Age M (SD) | Education M (SD)    | MMSE M (SD) | Disease duration M (SD) | % APOE-ε4 carriers | NPS                                   | Outcome measure                        |
|------------------------------------------|-----------|---------------------------------|---------|---------------|--------------|------------|---------------------|-------------|-------------------------|--------------------|---------------------------------------|----------------------------------------|
| Connors et al., 2018 <sup>11</sup>       | Australia | Memory clinic                   | 445     | 223 (50.1%)   | 222 (49.9%)  | 78.7 (7.3) | >Secondary 33.7%    | 21.1 (5.3)  | 1.6 (1.9)               | NR                 | Hallucinations, delusions             | NPI-items >0                           |
| Del Prete et al., 2009 <sup>12</sup>     | Italy     | Memory clinic                   | 53      | 36 (67.9%)    | 17 (32.1%)   | 74.0 (7.1) | 6.2 (4.0)           | 19.3 (4.5)  | 2.0 (1.4)               | 47.2%              | Depression, Anxiety                   | NPI-items >0                           |
| Delano-Wood et al., 2008 <sup>13</sup>   | USA       | Memory clinic                   | 323     | 160 (49.5%)   | 163 (50.5%)  | 72.6 (9.2) | 13.0 (4.0)          | 20.4 (5.5)  | 3.8 (2.4)               | 67.5%              | Depression                            | DSM-III-R DD diagnosis                 |
| Derouesné et al., 1996 <sup>14</sup>     | France    | Memory clinic                   | 135     | 74 (54.8%)    | 61 (45.2%)   | 69.3 (8.9) | NR                  | 17.1 (6.5)  | 4.3 (2.3)               | NR                 | Total score                           | PBQ                                    |
| Eustace et al., 2001 <sup>15</sup>       | Ireland   | Memory clinic                   | 150     | 103 (68.7%)   | 47 (31.3%)   | 76.5 (8.3) | NR                  | 19.3 (4.7)  | NR                      | NR                 | Aggression                            | BEHAVE-AD >0                           |
| Finger et al., 2017 <sup>16</sup>        | Canada    | Memory clinic                   | 758     | 315 (41.6%)   | 443 (58.4%)  | 75.3 (6.8) | 15.6 (2.8)          | 26.4 (3.4)  | NR                      | 26.1%              | Disinhibition                         | NPI-Q or NPI-item >0                   |
| Gomez-Gallego et al., 2020 <sup>17</sup> | Spain     | Primary healthcare, day centers | 196     | 119 (60.7%)   | 77 (39.3%)   | 77.6 (8.0) | 4.5 (2.8)           | 17.1 (5.0)  | NR                      | NR                 | 9 NPI-items                           | Severity x frequency scores            |
| Gormley et al., 1998a <sup>18</sup>      | UK        | Day center, inpatients          | 70      | 45 (64.0%)    | 25 (36.0%)   | 78.3 (6.7) | NR                  | 12.7 (7.9)  | NR                      | NR                 | Aggression                            | RAGE item 21 >0                        |
| Gormley et al., 1998b <sup>19</sup>      | UK        | Day center, inpatients          | 70      | 45 (64.0%)    | 25 (36.0%)   | 78.3 (6.7) | NR                  | 12.7 (7.9)  | NR                      | NR                 | Psychotic symptoms                    | BEHAVE-AD >0                           |
| Hall et al., 2014 <sup>20</sup>          | USA       | Memory clinic                   | 220     | 144 (72.0%)   | 76 (28.0%)   | 77.7 (6.9) | 14.1 (3.2)          | 19.1 (6.1)  | NR                      | 59.0%              | No. NPS                               | NPI-Q                                  |
| Hsieh et al., 2020 <sup>22</sup>         | Taiwan    | Memory clinic, NH               | 460     | 280 (60.9 %)  | 180 (39.1 %) | 77.2 (7.9) | <6y 55.0% >6y 45.0% | 17.4 (6.4)  | NR                      | 22.0%              | 12 NPI-items                          | Severity x frequency scores            |
| Ikezaki et al., 2020 <sup>21</sup>       | Japan     | Memory clinic                   | 230     | 159 (69.1%)   | 71 (30.9%)   | 77.3 (7.9) | 11.3 (2.3)          | 23.3 (1.9)  | 2.3 (1.6)               | NR                 | Total score, 10 NPI-items, depression | NPI everity x frequency scores, GDS-15 |

| Study                                | Country     | Sample             | N total | N (%) females | N (%) males | Age M (SD)  | Education M (SD) | MMSE M (SD)               | Disease duration M (SD) | % APOE-ε4 carriers | NPS                              | Outcome measure                    |
|--------------------------------------|-------------|--------------------|---------|---------------|-------------|-------------|------------------|---------------------------|-------------------------|--------------------|----------------------------------|------------------------------------|
| Kabeshita et al., 2016 <sup>23</sup> | Japan       | Memory clinic      | 684     | 478 (69.9%)   | 206 (30.1%) | 76.3 (8.7)  | 11.0 (2.9)       | 18.8 (5.3)                | NR                      | NR                 | Night-time behaviors             | NPI-item >0                        |
| Kaiser et al., 2014 <sup>24</sup>    | USA         | Memory clinic      | 22 LO   | 7 (31.8%)     | 15 (68.2%)  | 80.3 (5.9)  | NR               | NR                        | 3.5 (2.2)               | NR                 | Anxiety                          | NPI-item >0                        |
| Karttunen et al., 2011 <sup>25</sup> | Finland     | Memory clinic      | 240     | 123 (51.3%)   | 117 (48.7%) | 75.1 (6.6)  | 7.5 (NR)         | 21.5 (3.4)                | 3.3 (2.1)               | NR                 | Delusions, AMB, depression       | NPI-items >0, BDI total score      |
| Kaufer et al., 1998 <sup>26</sup>    | USA         | Memory clinic      | 85      | 41 (48.2%)    | 44 (51.8%)  | 75.9 (6.9)  | NR               | 16.6 (7.7)                | NR                      | NR                 | Total score                      | NPI                                |
| Kwak et al., 2013 <sup>27</sup>      | Korea       | Memory clinic      | 230     | 142 (61.7%)   | 88 (38.3%)  | 74.7 (7.8)  | 8.9 (5.8)        | 19.2 (5.8)                | 2.9 (2.2)               | NR                 | Delusions                        | NPI-item >0                        |
| Landes et al., 2005 <sup>28</sup>    | USA         | Memory clinic      | 131     | 70 (53.4%)    | 61 (46.6%)  | 75.1 (8.1)  | 13.0 (3.3)       | 18.5 (6.9)                | NR                      | NR                 | Apathy, depression               | DAIR, BRDS total scores            |
| Lee et al., 2017 <sup>29</sup>       | Korea       | Memory clinic      | 66 mild | 39 (57.4%)    | 27 (39.7%)  | 77.0 (7.0)  | 9.6 (4.6)        | 22.4 (2.5)                | NR                      | NR                 | 12 NPI-items                     | Severity x frequency scores        |
| Lee et al., 2017 <sup>29</sup>       | Korea       | Memory clinic      | 59 mod. | 39 (66.1%)    | 20 (33.9%)  | 77.3 (7.5)  | 6.4 (5.1)        | 14.7 (2.4)                | NR                      | NR                 | 12 NPI-items                     | Severity x frequency scores        |
| Leroi et al., 2003 <sup>30</sup>     | USA         | Community based    | 201     | 138 (53.1%)   | 63 (46.9%)  | 84.6 (6.7)  | 12.4 (3.0)       | 15.9 (7.7)                | 4.7 (3.3)               | 33.0%              | Psychosis                        | NPI delusions or hallucinations >0 |
| Levy et al., 1996 <sup>31</sup>      | USA         | Placebo arm of RCT | 181     | 100 (55.0%)   | 81 (45.0%)  | 74.0% <76.0 | ≥College 50.0%   | 72.0% <23.0               | NR                      | NR                 | Depression, agitation, psychosis | ADAS-Non-Cog >0                    |
| Linszen et al., 2018 <sup>32</sup>   | Netherlands | Memory clinic      | 1,227   | 629 (51.3%)   | 598 (48.7%) | 66.6 (7.9)  | NR               | 21.0 (17–24) <sup>c</sup> | NR                      | 61.9%              | Hallucinations                   | NPI-item >0                        |
| Liu et al., 1999 <sup>33</sup>       | Taiwan      | Memory clinic      | 141     | 78 (55.3%)    | 63 (44.7%)  | 72.7 (8.7)  | 7.9 (5.8)        | NR                        | NR                      | NR                 | Depression                       | DSM-III-R DD diagnosis             |

| Study                                     | Country                              | Sample                        | N total | N (%) females | N (%) males | Age M (SD)                | Education M (SD)        | MMSE M (SD)               | Disease duration M (SD) | % APOE-ε4 carriers | NPS                     | Outcome measure                           |
|-------------------------------------------|--------------------------------------|-------------------------------|---------|---------------|-------------|---------------------------|-------------------------|---------------------------|-------------------------|--------------------|-------------------------|-------------------------------------------|
| Matsuoka et al., 2018 <sup>34</sup>       | Japan                                | Memory clinic                 | 63      | 44 (69.8%)    | 19 (30.2%)  | 79.0 (6.9)                | NR                      | 20.1 (4.2)                | 1.8 (1.4)               | NR                 | Night-time behaviors    | NPI-item >0                               |
| Migliorelli et al., 1995 <sup>35</sup>    | Argentina                            | Memory clinic                 | 103     | 76 (73.8%)    | 27 (26.2%)  | 73.6 (7.5)                | 10.0 (4.9)              | 18.7 (6.5)                | 4.3 (2.5)               | NR                 | Depression              | DSM-III-R MD, dystemia diagnosis          |
| Moran E.K. et al., 2008 <sup>37</sup>     | USA                                  | Memory clinic                 | 103     | 68 (66.0%)    | 35 (34.0%)  | 79.0 (6.0)                | NR                      | 16.5 (6.2)                | NR                      | NR                 | Psychotic symptoms      | BEHAVE-AD >0                              |
| Moran M. et al., 2005 <sup>36</sup>       | Ireland                              | Memory clinic                 | 224     | 157 (70.1%)   | 67 (29.9%)  | 74.9 (7.7)                | NR                      | 18.3 (5.3)                | NR                      | NR                 | Sleep disturbance       | BEHAVE-AD >0                              |
| Mulin et al., 2011 <sup>39</sup>          | Multicenter (Europe, USA, Argentina) | Memory clinic                 | 132     | 88 (66.7%)    | 44 (33.3%)  | 79.2 (6.5)                | NR                      | 18.3 (4.6)                | NR                      | NR                 | Apathy                  | Apathy in AD diagnosis                    |
| Müller-Thomsen et al., 2002 <sup>38</sup> | Germany                              | Memory clinic                 | 137     | 93 (67.9%)    | 44 (32.1%)  | 71.3 (8.9)                | 9.3 (1.6)               | 18.1 (6.2)                | 3.2 (2.4)               | 60.5%              | Depression              | ICD-10 DD diagnosis                       |
| de Oliveira et al., 2017 <sup>40</sup>    | Brazil                               | Memory clinic                 | 201     | 141 (70.1%)   | 60 (29.9%)  | 73.5 (6.3)                | NR                      | NR                        | NR                      | 53.7%              | 10 NPI-items            | NPI-items >0, Severity x frequency scores |
| Ott et al., 1996 <sup>41</sup>            | USA                                  | Memory clinic                 | 125     | 75 (60.0%)    | 50 (40.0%)  | 74.7 (6.0)                | 12.1 (6.7)              | 18.3 (5.6)                | 2.9 (1.6)               | NR                 | Total score, depression | DBDS, CSDD                                |
| Porta-Etessam et al., 2011 <sup>42</sup>  | Spain                                | Memory clinic, NH, day center | 1,248   | 850 (68.1%)   | 398 (31.9%) | 77.8 (6.7)                | NR                      | 15.7 (4.3) <sup>d</sup>   | 2.0 (1.3)               | NR                 | Depression              | CSDD >9                                   |
| Pusswald et al. 2015 <sup>43</sup>        | Austria                              | Memory clinic                 | 286     | 173 (60.5%)   | 113 (39.5%) | 79.0 (73–84) <sup>c</sup> | 8.5 (9–13) <sup>c</sup> | 22.5 (19–25) <sup>c</sup> | 2.0 (1–3) <sup>c</sup>  | NR                 | Depression              | GDS-15                                    |
| Rozzini et al., 2007 <sup>44</sup>        | Italy                                | Memory clinic                 | 135     | 99 (73.3%)    | 36 (26.7%)  | 75.5 (7.2)                | 5.9 (3.0)               | 20.9 (3.9)                | 2.2 (1.1)               | NR                 | Depression              | DSM-IV dAD diagnosis                      |



| Study                                 | Country | Sample          | N total | N (%) females | N (%) males | Age M (SD)              | Education M (SD) | MMSE M (SD) | Disease duration M (SD) | % APOE-ε4 carriers | NPS              | Outcome measure                           |
|---------------------------------------|---------|-----------------|---------|---------------|-------------|-------------------------|------------------|-------------|-------------------------|--------------------|------------------|-------------------------------------------|
| Senanarong et al., 2004 <sup>46</sup> | USA     | Memory clinic   | 277     | 188 (68%)     | 89 (32%)    | 76.3 (8.0)              | 13.0 (3.6)       | 19.2 (6.5)  | NR                      | NR                 | Agitation        | NPI-items >0, Severity x frequency scores |
| Shi et al., 2020 <sup>45</sup>        | China   | Memory clinic   | 158     | 86 (54.4%)    | 72 (45.6%)  | 73.1 (5.6)              | NR               | 23.8 (1.8)  | NR                      | NR                 | Any NPS          | NPI-Q >0                                  |
| Sinforiani et al., 2010 <sup>47</sup> | Spain   | Memory clinic   | 600     | 386 (64.3%)   | 214 (35.7%) | 75.1 (6.5)              | 5.5 (4.3)        | 19.2 (3.5)  | NR                      | NR                 | Total score      | NPI                                       |
| Slifer et al., 2009 <sup>48</sup>     | USA     | Memory clinic   | 528     | 337 (63.8%)   | 191 (36.2%) | 72.2 (6.2)              | NR               | NR          | NR                      | 48.7%              | Depression       | GDS >9                                    |
| Spalletta et al., 2010 <sup>49</sup>  | Italy   | Memory clinic   | 1,015   | 723 (71.2%)   | 292 (28.8%) | 74.6 (0.2)              | 6.2 (0.1)        | 18.3 (0.2)  | 2.7 (0.1)               | NR                 | 12 NPI-items     | Severity x frequency scores               |
| Steffens et al., 2005 <sup>50</sup>   | USA     | Community based | 149     | 24 (16.1%)    | 125 (83.9%) | 77.3 (5.0) <sup>e</sup> | NR               | NR          | NR                      | NR                 | 12 NPI-items     | NPI-items >0, Severity x frequency scores |
| Suma et al., 2018 <sup>51</sup>       | Japan   | Memory clinic   | 853     | 578 (67.8%)   | 275 (32.2%) | 79.0 (6.5)              | 10.3 (2.6)       | 18.8 (4.1)  | NR                      | NR                 | Eating behaviors | CNAQ <29                                  |
| Toyota et al., 2007 <sup>52</sup>     | Japan   | Memory clinic   | 261 LO  | 181 (69.3%)   | 80 (30.7%)  | 78.5 (5.1)              | 9.5 (2.3)        | 19.0 (6.0)  | 3.2 (2.4)               | NR                 | Delusions        | NPI-item >0                               |
| Toyota et al., 2007 <sup>52</sup>     | Japan   | Memory clinic   | 46 EO   | 22 (47.8%)    | 24 (52.2%)  | 58.8 (5.0)              | 11.8 (2.7)       | 17.4 (6.3)  | 3.5 (2.0)               | NR                 | Delusions        | NPI-item >0                               |
| Treiber et al., 2008 <sup>53</sup>    | USA     | Community based | 254     | 173 (68.1%)   | 81 (31.9%)  | 85.7 (6.6)              | 13.3 (2.9)       | NR          | 1.9 (1.3)               | NR                 | Disinhibition    | NPI Severity x frequency scores           |
| Troisi et al., 1996 <sup>54</sup>     | Italy   | Memory clinic   | 42      | 25 (59.5%)    | 17 (40.5%)  | 76.2 (6.1)              | 6.6 (4.7)        | 14.2 (5.9)  | NR                      | NR                 | Depression       | HRSD-PSY subscore                         |
| Tunnard et al., 2011 <sup>55</sup>    | UK      | Memory clinic   | 111     | 76 (68.5%)    | 35 (31.5%)  | 75.2 (6.2)              | 8.1 (4.0)        | 20.8 (4.8)  | 4.0 (2.9)               | NR                 | Apathy           | NPI-item >0                               |

| Study                                     | Country  | Sample          | N total  | N (%) females | N (%) males | Age M (SD)   | Education M (SD) | MMSE M (SD)             | Disease duration M (SD) | % APOE-ε4 carriers | NPS          | Outcome measure    |
|-------------------------------------------|----------|-----------------|----------|---------------|-------------|--------------|------------------|-------------------------|-------------------------|--------------------|--------------|--------------------|
| Usman et al., 2010 <sup>56</sup>          | Pakistan | Memory clinic   | 76       | 42 (55.3%)    | 34 (44.7%)  | 67.7 (6.7)   | >12y 10.5%       | 68.4% <20.0             | NR                      | NR                 | Depression   | HRSD >7            |
| Vilalta-Franch et al., 2013 <sup>57</sup> | Spain    | Memory clinic   | 491      | 348 (70.9%)   | 143 (29.1%) | 75.2 (6.6)   | 5.9 (3.7)        | NR                      | 2.7 (2.3)               | NR                 | Psychosis    | PoAD diagnosis     |
| Xing et al., 2015 <sup>58</sup>           | China    | Memory clinic   | 158 mild | 84 (53.2%)    | 74 (46.8%)  | 70.9 (9.6)   | 7.6 (5.2)        | 17.5 (5.2)              | NR                      | 34.8%              | 12 NPI-items | NPI-items >0       |
| Xing et al., 2015 <sup>58</sup>           | China    | Memory clinic   | 157 mod. | 92 (58.6%)    | 65 (41.4%)  | 67.7 (10.4)  | 6.1 (4.7)        | 12.3 (5.5)              | NR                      | 39.4%              | 12 NPI-items | NPI-items >0       |
| Yang et al., 2017 <sup>59</sup>           | China    | Community based | 104      | 75 (72.1%)    | 29 (27.9%)  | 71.8 (60–85) | ≥Secondary 15.4% | 21.3 (4.8) <sup>f</sup> | NR                      | NR                 | Depression   | GDS-30 total score |
| Yang et al., 2020 <sup>60</sup>           | China    | Memory clinic   | 158      | 84 (53.2%)    | 74 (46.8%)  | 74.1 (5.8)   | NR               | 14.5 (7.6)              | NR                      | NR                 | Depression   | HRSD ≥17           |
| Zeitzer et al., 2013 <sup>61</sup>        | France   | Memory clinic   | 92       | 46 (50%)      | 46 (50%)    | 77.9 (6.6)   | NR               | 21.0 (5.5)              | NR                      | NR                 | Apathy       | NPI-item >2        |
| Zhao et al., 2012 <sup>62</sup>           | China    | Memory clinic   | 83       | 40 (48.2%)    | 43 (51.8%)  | 74.0 (8.3)   | 8.7 (4.0)        | 18.0 (7.7)              | 3.7 (3.1)               | NR                 | Apathy       | NPI-item >0        |

**Abbreviations:** MMSE, Mini-mental state examination; NPS, neuropsychiatric symptoms; NR, not reported; USA, United States of America; UK, United Kingdom; EO, early-onset; LO, late-onset; AMB, aberrant motor behaviors; NPI, Neuropsychiatric Inventory; NPI-Q, Neuropsychiatric Inventory Questionnaire; GMSS, Geriatric Mental State Schedule; SGRC, Stockton Geriatric Rating Scale; ICD-9, International Classification of Diseases; DD, depressive disorder; NIMH-dAD, National Institute of Mental Health criteria for depression in Alzheimer’s disease (Olin et al. [2002] Am J Geriatr Psychiatry; DSM, Diagnostic and Statistical Manual of Mental Disorders; PBQ, Psychobehavioral Questionnaire; BEHAVE-AD, Behavioural pathology in Alzheimer’s disease; RAGE, Rating scale for aggressive behaviour in the elderly; BDI, Beck Depression Inventory; DAIR, Dementia Apathy Interview and Rating; BRSD, Behavior Rating Scale for Dementia; ADAS-Non-Cog, non-cognitive section of the Alzheimer’s disease Assessment Scale; DBDS, Dementia Behavior Disturbance Scale; CSDD, Cornell Scale for Depression in Dementia; GDS, Geriatric Depression Scale; CNAQ, Council of Nutrition Appetite Questionnaire; HRSD-PSY,

Intrapsychic subscore of the Hamilton Rating Scale for Depression; PoAD, psychosis in Alzheimer's disease (Jeste & Finkel [2000] Am J Geriatr).

<sup>a</sup> M(SD) of total sample including mild and moderate AD

<sup>b</sup> Studies reported corrected effect sizes

<sup>c</sup> Median (interquartile range)

<sup>d</sup> Baseline MMSE scores of subsample of patients who had six months follow-up assessments available (N=852/N=1248).

<sup>e</sup> M (SD) age of total dementia population (N=211) of which 149 patients had AD

<sup>f</sup> M(SD) of the Montreal Cognitive Assessment (MoCA)

**eTable 4. Meta-regression analyses on the prevalence of specific neuropsychiatric symptoms in Alzheimer’s disease dementia**

| NPS                      | K  | Clinically relevance (presence vs relevance)                                                  | Method of assessment (proxy vs self-report)                                         | NPI vs non-NPI                                                               | Mean age                                | Mean education in years               | Mean MMSE score                         | Mean disease duration in years        | %APOE-E4 carriers                     |
|--------------------------|----|-----------------------------------------------------------------------------------------------|-------------------------------------------------------------------------------------|------------------------------------------------------------------------------|-----------------------------------------|---------------------------------------|-----------------------------------------|---------------------------------------|---------------------------------------|
| Aberrant motor behaviors | 7  | NR                                                                                            | NR                                                                                  | NR                                                                           | $k=7, QM=0.22, p=0.64, estimate=-0.03$  | NA                                    | NA                                      | NR                                    | NR                                    |
| Agitation                | 11 | NA                                                                                            | NR                                                                                  | $k=11, QM=0.98, p=0.33, NPI OR=0.67 [0.36-1.55], nonNPI OR=0.99 [0.63-1.55]$ | $k=10, QM=3.02, p=0.08, estimate=-0.08$ | NA                                    | $k=7, QM=0.01, p=0.93, estimate=0.01$   | NR                                    | NR                                    |
| Anxiety                  | 8  | NR                                                                                            | NR                                                                                  | NR                                                                           | $k=8, QM=0.54, p=0.46, estimate=-0.09$  | NA                                    | NA                                      | NR                                    | NA                                    |
| Apathy                   | 12 | NA                                                                                            | NR                                                                                  | NA                                                                           | $k=12, QM=0.02, p=0.89, estimate=-0.01$ | NA                                    | $k=10, QM=0.53, p=0.47, estimate=-0.05$ | NA                                    | NA                                    |
| Delusions                | 12 | NR                                                                                            | NR                                                                                  | NR                                                                           | $k=12, QM=0.00, p=0.99, estimate=0.00$  | $k=7, QM=1.65, p=0.20, estimate=0.10$ | $k=10, QM=0.01, p=0.92, estimate=0.00$  | $k=6, QM=5.19, p=0.02, estimate=0.32$ | NA                                    |
| Depressive symptoms      | 20 | $k=20, QM=0.09, p=0.76, presence OR=1.66 [1.21-2.28], clinical relevance OR=1.55 [1.13-2.11]$ | $k=20, QM=0.05, p=0.83, Proxy OR=1.63 [1.25-2.12], Self-report OR=1.54 [1.00-2.37]$ | $k=20, QM=0.09, p=0.77, NPI OR=1.67 [1.17-2.39], nonNPI OR=1.56 [1.17-2.08]$ | $k=19, QM=0.91, p=0.34, estimate=-0.04$ | $k=9, QM=0.00, p=0.95, estimate=0.01$ | $k=13, QM=0.16, p=0.69, estimate=0.02$  | $k=8, QM=0.30, p=0.59, estimate=0.13$ | $k=7, QM=0.04, p=0.84, estimate=0.00$ |
| Disinhibition            | 8  | NR                                                                                            | NR                                                                                  | NR                                                                           | $k=8, QM=8.20, p=0.004, estimate=-0.11$ | NA                                    | NA                                      | NR                                    | NA                                    |

| <b>NPS</b>            | <b>K</b> | <b>Clinically<br/>relevance<br/>(presence vs<br/>relevance)</b> | <b>Method of<br/>assessment<br/>(proxy vs self-<br/>report)</b> | <b>NPI vs non-<br/>NPI</b> | <b>Mean age</b>                                     | <b>Mean<br/>education in<br/>years</b> | <b>Mean MMSE<br/>score</b>                          | <b>Mean disease<br/>duration in<br/>years</b> | <b>%APOE-E4<br/>carriers</b> |
|-----------------------|----------|-----------------------------------------------------------------|-----------------------------------------------------------------|----------------------------|-----------------------------------------------------|----------------------------------------|-----------------------------------------------------|-----------------------------------------------|------------------------------|
| Euphoria              | 6        | NR                                                              | NR                                                              | NR                         | <i>k=6, QM=2.87,<br/>p=0.09,<br/>estimate=0.14</i>  | NA                                     | NA                                                  | NR                                            | NR                           |
| Halluci-<br>nations   | 9        | NR                                                              | NR                                                              | NR                         | <i>k=9, QM=0.12,<br/>p=0.73,<br/>estimate=0.01</i>  | NA                                     | <i>k=6, QM=0.01,<br/>p=0.92,<br/>estimate=0.01</i>  | NR                                            | NA                           |
| Irritability          | 6        | NR                                                              | NR                                                              | NR                         | <i>k=6, QM=1.09,<br/>p=0.30,<br/>estimate=-0.08</i> | NA                                     | NA                                                  | NR                                            | NR                           |
| Sleep<br>disturbances | 8        | NR                                                              | NR                                                              | NR                         | NA                                                  | NA                                     | <i>k=8, QM=0.11,<br/>p=0.74,<br/>estimate=-0.02</i> | NR                                            | NR                           |

*Abbreviations:* NR, not reported; NA, not available due to the low number of studies.

Meta-regression analyses were not possible for eating behaviors, psychotic symptoms, and studies reporting on  $\geq 1$  NPS due to the low number of studies available.

**eTable 5. Meta-regression analyses on severity of specific of specific neuropsychiatric symptoms in Alzheimer’s disease dementia**

| NPS                      | k  | Method of assessment (proxy vs self-report)                                                         | NPI vs non-NPI                                                                               | Mean age of patients in years                  | Mean education in years                        | Mean MMSE score                                | Mean disease duration in years | %APOE E4 carriers |
|--------------------------|----|-----------------------------------------------------------------------------------------------------|----------------------------------------------------------------------------------------------|------------------------------------------------|------------------------------------------------|------------------------------------------------|--------------------------------|-------------------|
| Aberrant motor behaviors | 10 | NR                                                                                                  | NA                                                                                           | $k=10, QM=0.00, p=0.96, \text{estimate}=0.00$  | $k=7, QM=0.31, p=0.58, \text{estimate}=-0.09$  | $k=8, QM=0.13, p=0.72, \text{estimate}=0.03$   | NA                             | NA                |
| Agitation                | 12 | NR                                                                                                  | NA                                                                                           | $k=12, QM=0.12, p=0.73, \text{estimate}=-0.02$ | $k=8, QM=0.63, p=0.43, \text{estimate}=-0.09$  | $k=10, QM=0.00, p=0.99, \text{estimate}=0.00$  | NA                             | NA                |
| Anxiety                  | 11 | NR                                                                                                  | NA                                                                                           | $k=11, QM=0.00, p=0.99, \text{estimate}=0.00$  | $k=7, QM=0.77, p=0.38, \text{estimate}=-0.48$  | $k=9, QM=0.00, p=0.95, \text{estimate}=0.02$   | NA                             | NA                |
| Apathy                   | 12 | NR                                                                                                  | NA                                                                                           | $k=12, QM=0.04, p=0.83, \text{estimate}=0.01$  | $k=8, QM=0.40, p=0.52, \text{estimate}=0.05$   | $k=10, QM=0.01, p=0.91, \text{estimate}=-0.01$ | NA                             | NA                |
| Delusions                | 11 | NR                                                                                                  | NA                                                                                           | $k=11, QM=0.13, p=0.72, \text{estimate}=0.02$  | $k=7, QM=0.12, p=0.73, \text{estimate}=-0.06$  | $k=9, QM=0.30, p=0.58, \text{estimate}=0.04$   | NA                             | NA                |
| Depressive symptoms      | 17 | $k=17, QM=0.39, p=0.54, \text{proxy } g=0.61 [-0.01-1.22], \text{self-report } g=0.29 [-0.48-1.07]$ | $k=17, QM=0.39, p=0.54, \text{NPI } g=0.61 [-0.01-1.22], \text{nonNPI } g=0.29 [-0.48-1.07]$ | $k=17, QM=0.03, p=0.86, \text{estimate}=-0.01$ | $k=11, QM=0.93, p=0.33, \text{estimate}=-0.14$ | $k=15, QM=0.05, p=0.82, \text{estimate}=-0.02$ | NA                             | NA                |
| Disinhibition            | 11 | NR                                                                                                  | NA                                                                                           | $k=11, QM=0.42, p=0.52, \text{estimate}=-0.03$ | $k=7, QM=1.89, p=0.17, \text{estimate}=0.14$   | $k=9, QM=0.21, p=0.65, \text{estimate}=0.02$   | NA                             | NA                |
| Eating behavior          | 6  | NA                                                                                                  | NA                                                                                           | $k=6, QM=0.99, p=0.32, \text{estimate}=0.01$   | NA                                             | $k=6, QM=2.81, p=0.09, \text{estimate}=0.04$   | NA                             | NA                |
| Euphoria                 | 11 | NR                                                                                                  | NA                                                                                           | $k=11, QM=0.06, p=0.81, \text{estimate}=0.01$  | $k=7, QM=0.42, p=0.52, \text{estimate}=-0.06$  | $k=9, QM=0.12, p=0.73, \text{estimate}=0.02$   | NA                             | NA                |
| Hallucinations           | 11 | NR                                                                                                  | NA                                                                                           | $k=11, QM=0.05, p=0.83, \text{estimate}=-0.01$ | $k=7, QM=1.93, p=0.16, \text{estimate}=-0.22$  | $k=9, QM=0.11, p=0.74, \text{estimate}=-0.03$  | NA                             | NA                |

| <b>NPS</b>                    | <b>k</b> |           | <b>Assessment<br/>(NPI vs non-NPI)</b> | <b>Mean age of<br/>patients in years</b>             | <b>Mean education<br/>in years</b>                   | <b>Mean MMSE<br/>score</b>                           | <b>Mean disease<br/>duration in years</b> | <b>%APOE E4<br/>carriers</b> |
|-------------------------------|----------|-----------|----------------------------------------|------------------------------------------------------|------------------------------------------------------|------------------------------------------------------|-------------------------------------------|------------------------------|
| Irritability                  | 11       | <i>NR</i> | <i>NA</i>                              | <i>k=11, QM=0.00,<br/>p=0.97, estimate=<br/>0.00</i> | <i>k=7, QM=0.01,<br/>p=0.93, estimate=<br/>0.00</i>  | <i>k=9, QM=0.16,<br/>p=0.68,<br/>estimate= -0.01</i> | <i>NA</i>                                 | <i>NA</i>                    |
| Sleep<br>disturbances         | 6        | <i>NR</i> | <i>NA</i>                              | <i>k=6, QM=0.04,<br/>p=0.83, estimate=<br/>0.00</i>  | <i>NA</i>                                            | <i>k=6, QM=4.40,<br/>p=0.04,<br/>estimate= 0.05</i>  | <i>NA</i>                                 | <i>NA</i>                    |
| Total score<br>NPS<br>measure | 14       | <i>NR</i> | <i>NA</i>                              | <i>k=14, QM=0.00,<br/>p=0.99, estimate=<br/>0.00</i> | <i>k=7, QM=1.04,<br/>p=0.31, estimate=<br/>-0.17</i> | <i>k=12, QM=0.03,<br/>p=0.87,<br/>estimate= 0.02</i> | <i>NA</i>                                 | <i>NA</i>                    |

*Abbreviations:* NR, not reported; NA, not available due to the low number of studies.

Meta-regression analyses were not possible for psychotic symptoms due to the low number of studies available.

**eTable 6. Publication bias measures for all meta-analyses conducted**

|                                              | <i>k</i> | Begg's rank test ( $\tau$ ) | P value | Egger's regression test (t) | P value |
|----------------------------------------------|----------|-----------------------------|---------|-----------------------------|---------|
| <b>NPS prevalence</b>                        |          |                             |         |                             |         |
| Aberrant motor behaviors (excluding outlier) | 6        | 0.29                        | 0.78    | -0.07                       | 1.00    |
| Agitation (excluding outlier)                | 10       | -0.56                       | 0.03    | -2.82                       | 0.02    |
| Anxiety                                      | 8        | -0.21                       | 0.55    | -0.63                       | 0.55    |
| Apathy                                       | 12       | -0.36                       | 0.12    | -1.13                       | 0.28    |
| Any NPS (excluding outlier)                  | 4        | -0.33                       | 0.75    | -0.36                       | 0.76    |
| Delusions                                    | 12       | 0.33                        | 0.15    | 1.74                        | 0.11    |
| Depressive symptoms                          | 20       | 0.20                        | 0.23    | 3.49                        | <0.01   |
| Disinhibition                                | 8        | 0.00                        | 1.00    | 0.29                        | 0.78    |
| Eating behavior                              | 5        | 0.20                        | 0.82    | -0.06                       | 0.96    |
| Euphoria                                     | 6        | 0.07                        | 1.00    | -0.14                       | 0.90    |
| Hallucinations                               | 9        | 0.50                        | 0.08    | 1.68                        | 0.14    |
| Irritability (excluding outlier)             | 5        | -0.20                       | 0.82    | -1.44                       | 0.24    |
| Psychotic symptoms (excluding outlier)       | 4        | -0.33                       | 0.75    | -0.32                       | 0.78    |
| Sleep disturbances                           | 8        | -0.14                       | 0.72    | -0.05                       | 0.96    |
| <b>NPS severity</b>                          |          |                             |         |                             |         |
| Aberrant motor behaviors (excluding outlier) | 9        | -0.22                       | 0.48    | -0.72                       | 0.50    |
| Agitation (excluding outlier)                | 11       | -0.16                       | 0.54    | -0.63                       | 0.54    |
| Anxiety (excluding outlier)                  | 10       | 0.11                        | 0.73    | -0.03                       | 0.98    |
| Apathy (excluding outlier)                   | 11       | 0.24                        | 0.36    | 0.62                        | 0.55    |
| Delusions (excluding outlier)                | 10       | -0.20                       | 0.48    | -0.77                       | 0.46    |
| Depressive symptoms (excluding outlier)      | 16       | -0.03                       | 0.89    | 0.18                        | 0.86    |
| Disinhibition (excluding outlier)            | 10       | -0.29                       | 0.29    | -0.96                       | 0.36    |
| Eating behavior                              | 6        | -0.07                       | 1.00    | -0.07                       | 0.94    |
| Euphoria (excluding outlier)                 | 10       | -0.07                       | 0.86    | 0.16                        | 0.88    |
| Hallucinations (excluding outlier)           | 10       | -0.20                       | 0.48    | -0.29                       | 0.78    |
| Irritability                                 | 11       | -0.27                       | 0.28    | -0.76                       | 0.47    |
| Total score NPS measure (excluding outlier)  | 13       | -0.18                       | 0.44    | -1.27                       | 0.23    |
| Sleep disturbances                           | 8        | -0.14                       | 0.72    | -0.05                       | 0.96    |

*Abbreviations:* *k*, number of studies; NPS, neuropsychiatric symptoms.



**eTable 7. Duval and Tweedie's trim-and-fill method to adjust for potential publication bias**

| <b>Meta-analysis</b>           | <b><i>k</i></b> | <b><i>OR</i> [95% <i>CI</i>]<sup>a</sup></b> | <b><i>z</i>-statistic</b> | <b><i>P</i></b> | <b><i>Q</i>-statistic</b> | <b><i>P Q</i>-statistic</b> | <b><i>I</i><sup>2</sup>-statistic</b> |
|--------------------------------|-----------------|----------------------------------------------|---------------------------|-----------------|---------------------------|-----------------------------|---------------------------------------|
| Prevalence agitation           | 10              | 1.00 [0.75, 1.35]                            | 0.01                      | 0.99            | 16.63                     | 0.06                        | 46.06                                 |
| <i>Trim-and-fill</i>           | 13              | 1.20 [0.87, 1.66]                            | 1.12                      | 0.26            | 29.06                     | 0.004                       | 60.56                                 |
| Prevalence depressive symptoms | 20              | 1.60 [1.28, 1.98]                            | 4.20                      | <0.001          | 51.99                     | <0.001                      | 58.19                                 |
| <i>Trim-and-fill</i>           | 21              | 1.55 [1.25, 1.94]                            | 3.90                      | < 0.001         | 56.11                     | < 0.001                     | 59.14                                 |

*Abbreviations:* *k*, number of studies; *OR*, odds ratio; *NPS*, neuropsychiatric symptoms.

<sup>a</sup> *OR*=1 no sex differences, *OR*>1 female sex associated with *NPS*; *OR*<1 male sex associated with *NPS*.

**eTable 8. Sex differences in the prevalence of neuropsychiatric symptoms for meta-analyses that excluded outliers**

| NPS                                    | <i>k</i> | OR [95% CI] <sup>a</sup> | z-statistic | <i>P</i> | <i>Q</i> -statistic | <i>P Q</i> -statistic | <i>I</i> <sup>2</sup> -statistic |
|----------------------------------------|----------|--------------------------|-------------|----------|---------------------|-----------------------|----------------------------------|
| Aberrant motor behaviors               | 6        | 1.47 [1.09, 1.98]        | 2.53        | 0.01     | 2.51                | 0.78                  | 0.00                             |
| <i>including outlier</i> <sup>25</sup> | 7        | 1.21 [0.79, 1.84]        | 0.87        | 0.39     | 14.16               | 0.03                  | 57.41                            |
| Agitation                              | 10       | 1.00 [0.75, 1.35]        | 0.01        | 0.99     | 16.63               | 0.06                  | 46.06                            |
| <i>including outlier</i> <sup>6</sup>  | 11       | 0.87 [0.60, 1.25]        | -0.77       | 0.44     | 28.57               | 0.002                 | 66.49                            |
| Any NPS                                | 4        | 1.35 [0.78–2.35]         | 1.07        | 0.28     | 4.01                | 0.25                  | 32.74                            |
| <i>including outlier</i> <sup>50</sup> | 5        | 1.06 [0.56, 2.01]        | 0.17        | 0.86     | 8.73                | 0.07                  | 57.49                            |
| Irritability                           | 5        | 1.14 [0.83, 1.56]        | 0.80        | 0.43     | 6.11                | 0.19                  | 0.00                             |
| <i>including outlier</i> <sup>40</sup> | 6        | 0.90 [0.55, 1.46]        | -0.44       | 0.66     | 12.86               | 0.02                  | 61.62                            |
| Psychotic symptoms                     | 4        | 1.62 [1.12, 2.33]        | 2.56        | <0.01    | 1.98                | 0.58                  | 0.00                             |
| <i>including outlier</i> <sup>19</sup> | 5        | 1.17 [0.60, 2.32]        | 0.46        | 0.64     | 12.74               | 0.01                  | 73.02                            |

Abbreviations: *k*, number of studies; OR, odds ratio; NPS, neuropsychiatric symptoms.

<sup>a</sup> OR=1 no sex differences, OR>1 female sex associated with NPS; OR<1 male sex associated with NPS.

**eTable 9. Sex differences in the severity of neuropsychiatric symptoms for meta-analyses that excluded outliers**

| NPS                                    | k  | Hedges' <i>g</i> [95% CI] <sup>a</sup> | z-statistic | <i>P</i> | <i>Q</i> -statistic | <i>P Q</i> -statistic | <i>I</i> <sup>2</sup> -statistic |
|----------------------------------------|----|----------------------------------------|-------------|----------|---------------------|-----------------------|----------------------------------|
| Aberrant motor behaviors               | 9  | 0.17 [0.08, 0.26]                      | 3.56        | <0.001   | 3.25                | 0.92                  | 0.00                             |
| <i>including outlier</i> <sup>49</sup> | 10 | 0.35 [-0.04, 0.74]                     | 1.76        | 0.08     | 372.89              | <0.001                | 95.21                            |
| Agitation                              | 11 | 0.01 [-0.07, 0.10]                     | 0.26        | 0.79     | 12.53               | 0.25                  | 3.12                             |
| <i>including outlier</i> <sup>49</sup> | 12 | 0.16 [-0.20, 0.52]                     | 0.87        | 0.39     | 471.66              | <0.001                | 95.45                            |
| Anxiety                                | 10 | 0.11 [0.00, 0.22]                      | 1.98        | 0.05     | 13.27               | 0.01                  | 25.15                            |
| <i>including outlier</i> <sup>49</sup> | 11 | 0.73 [-0.50, 1.97]                     | 1.17        | 0.24     | 1544.28             | <0.001                | 99.50                            |
| Apathy                                 | 11 | -0.10 [-0.18, -0.01]                   | -2.25       | 0.02     | 5.00                | 0.89                  | 0.00                             |
| <i>including outlier</i> <sup>49</sup> | 12 | -0.21 [-0.47, 0.05]                    | -1.61       | 0.11     | 244.64              | <0.001                | 90.71                            |
| Depressive symptoms                    | 16 | 0.24 [0.14, 0.34]                      | 4.59        | <0.001   | 30.15               | 0.02                  | 44.29                            |
| <i>including outlier</i> <sup>49</sup> | 17 | 0.49 [0.05, 0.96]                      | 2.00        | 0.05     | 1140.34             | <0.001                | 97.85                            |
| Delusions                              | 10 | 0.19 [0.04, 0.34]                      | 2.53        | 0.01     | 19.99               | 0.02                  | 58.78                            |
| <i>including outlier</i> <sup>49</sup> | 11 | 0.34 [-0.03, 0.72]                     | 1.83        | 0.07     | 381.71              | <0.001                | 95.17                            |
| Disinhibition                          | 10 | 0.08 [-0.05, 0.21]                     | 1.16        | 0.25     | 17.01               | 0.05                  | 46.48                            |
| <i>including outlier</i> <sup>49</sup> | 11 | -0.06 [-0.30, 0.20]                    | -0.43       | 0.67     | 179.25              | <0.001                | 89.63                            |
| Euphoria                               | 10 | 0.00 [-0.10, 0.10]                     | -0.04       | 0.97     | 8.10                | 0.52                  | 14.55                            |
| <i>including outlier</i> <sup>49</sup> | 11 | 0.11 [-0.11, 0.33]                     | 0.96        | 0.33     | 144.78              | <0.001                | 86.49                            |
| Hallucinations                         | 10 | 0.07 [-0.13, 0.26]                     | 0.65        | 0.51     | 36.63               | <0.001                | 77.20                            |
| <i>including outlier</i> <sup>49</sup> | 11 | 0.25 [-0.15, 0.65]                     | 1.20        | 0.23     | 452.69              | <0.001                | 95.87                            |
| Total score NPS measure                | 13 | 0.04 [-0.04, 0.12]                     | 1.03        | 0.31     | 7.54                | 0.82                  | 0.00                             |
| <i>including outlier</i> <sup>49</sup> | 14 | 0.29 [-0.24, 0.83]                     | 1.07        | 0.29     | 1021.77             | <0.001                | 97.89                            |

Abbreviations: k, number of studies; OR, odds ratio; NPS, neuropsychiatric symptoms.

<sup>a</sup> Hedges' *g* >0 female sex associated with NPS; Hedges' *g* <0 male sex associated with NPS

**eFigure 1. Forest plots meta-analyses prevalence specific NPS**

**A) Forest plot prevalence agitation**

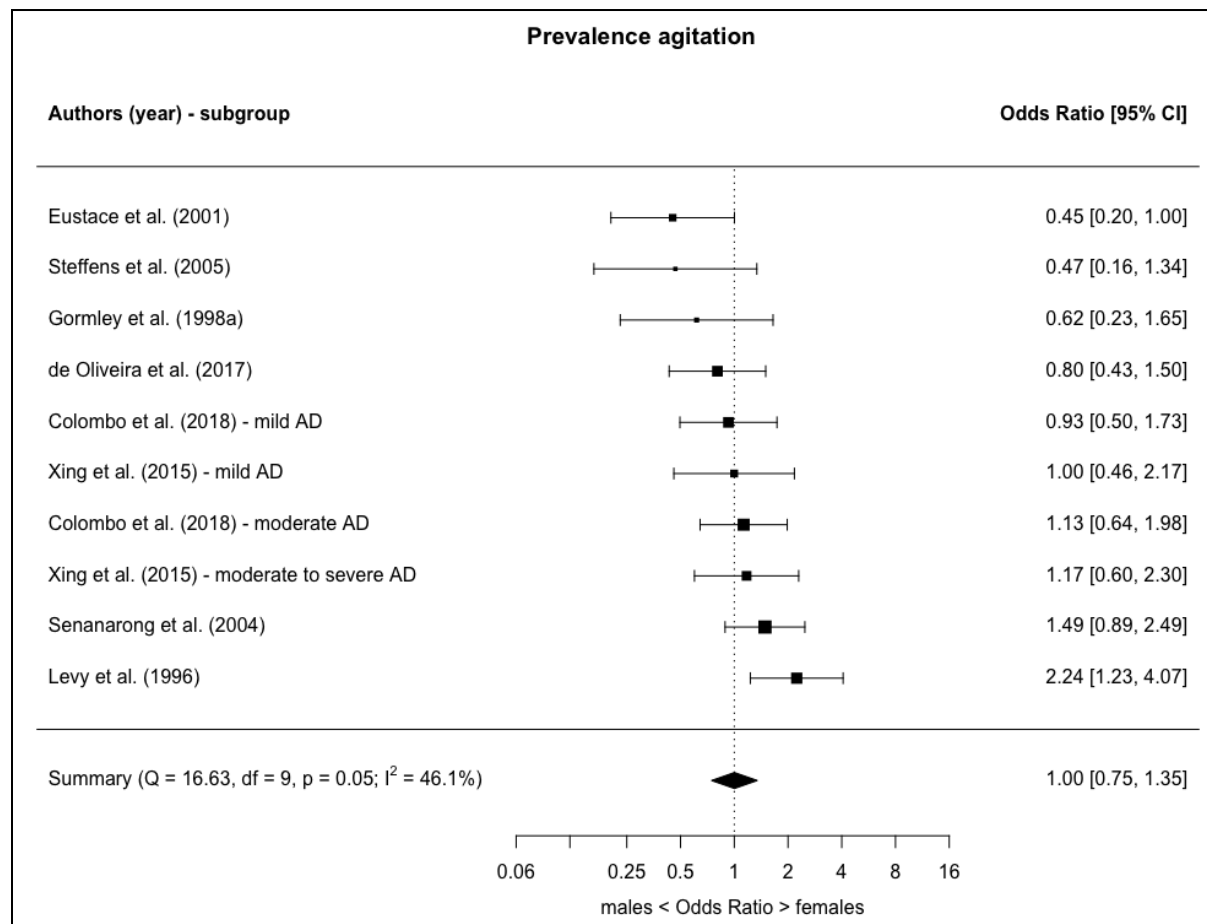

## B) Forest plot prevalence anxiety

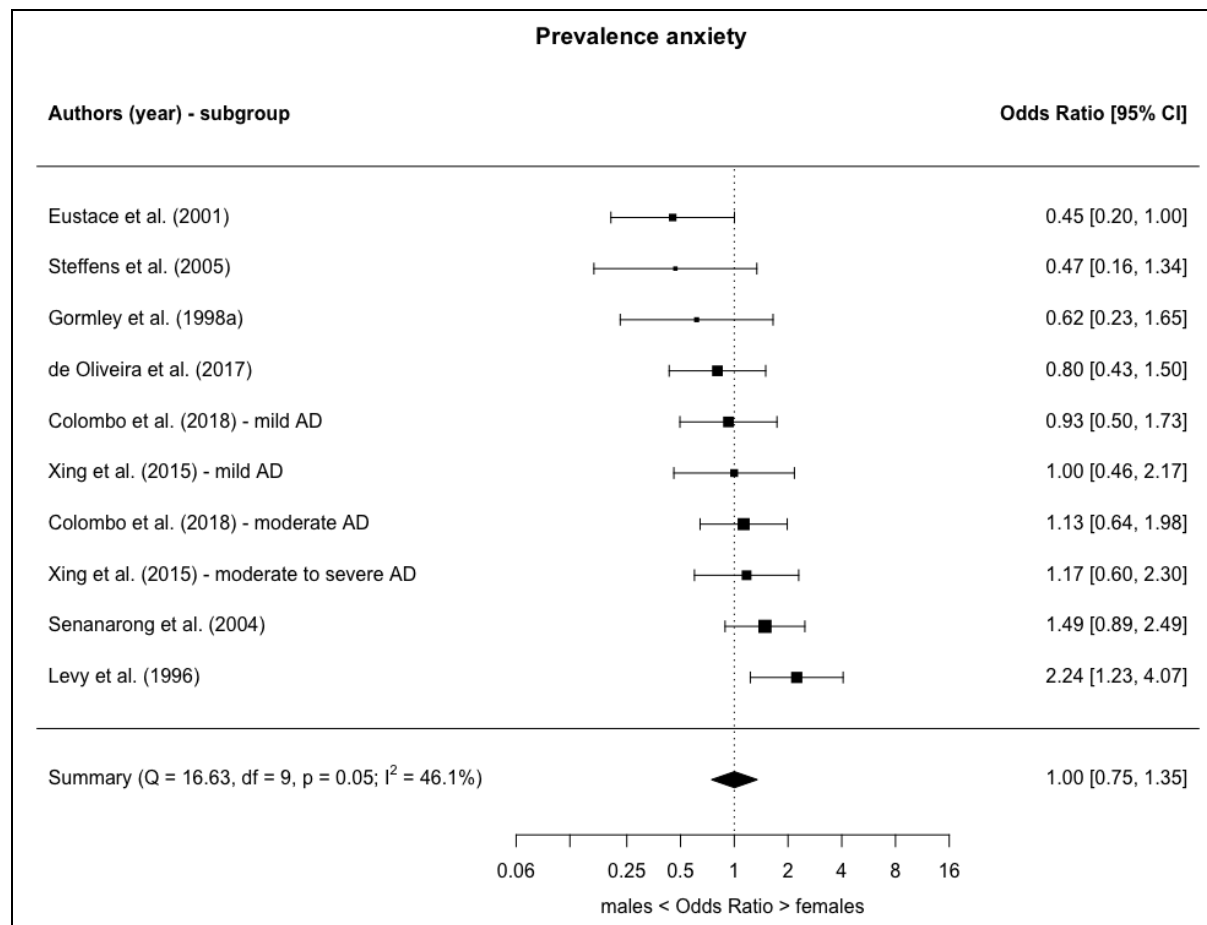

### C) Forest plot prevalence apathy

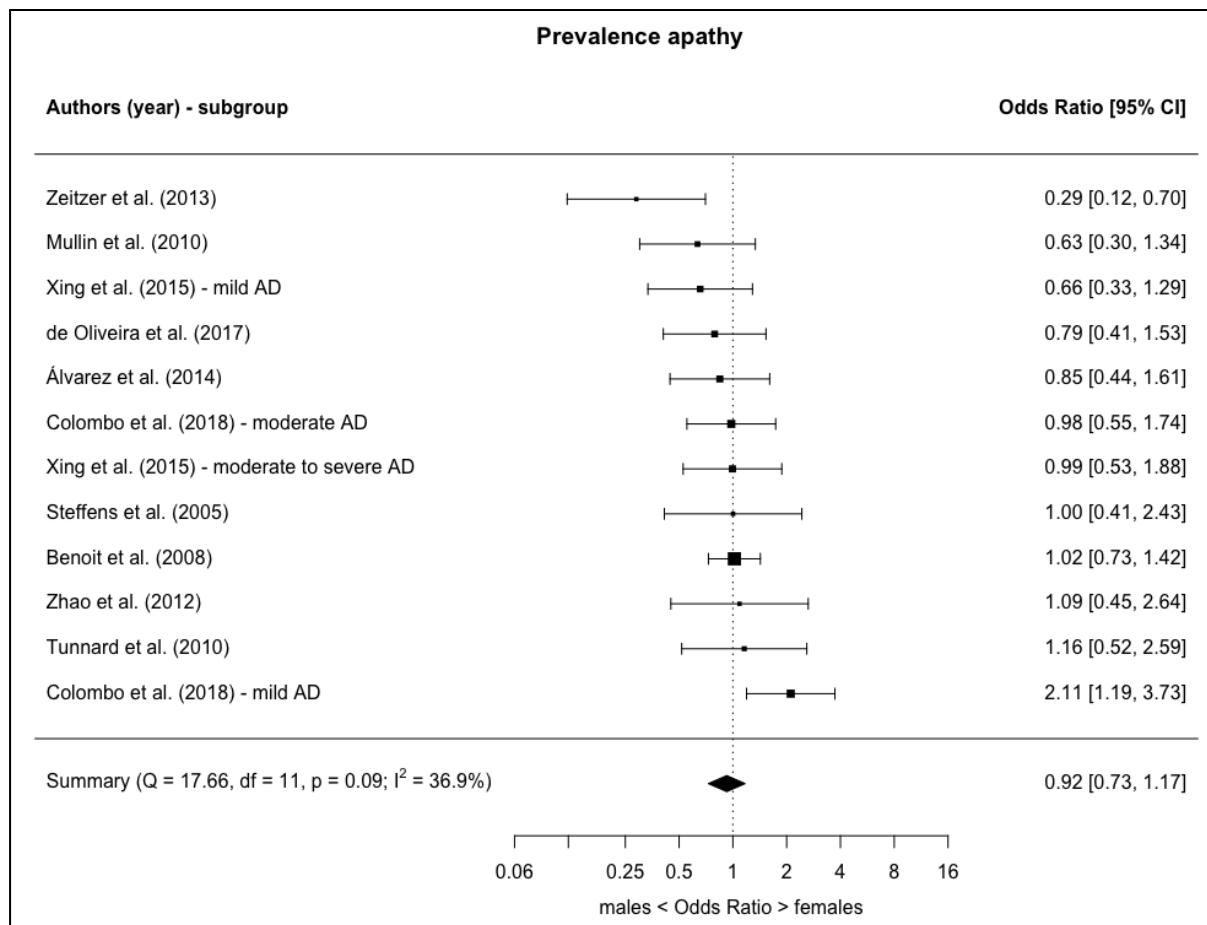

### D) Forest plot prevalence disinhibition

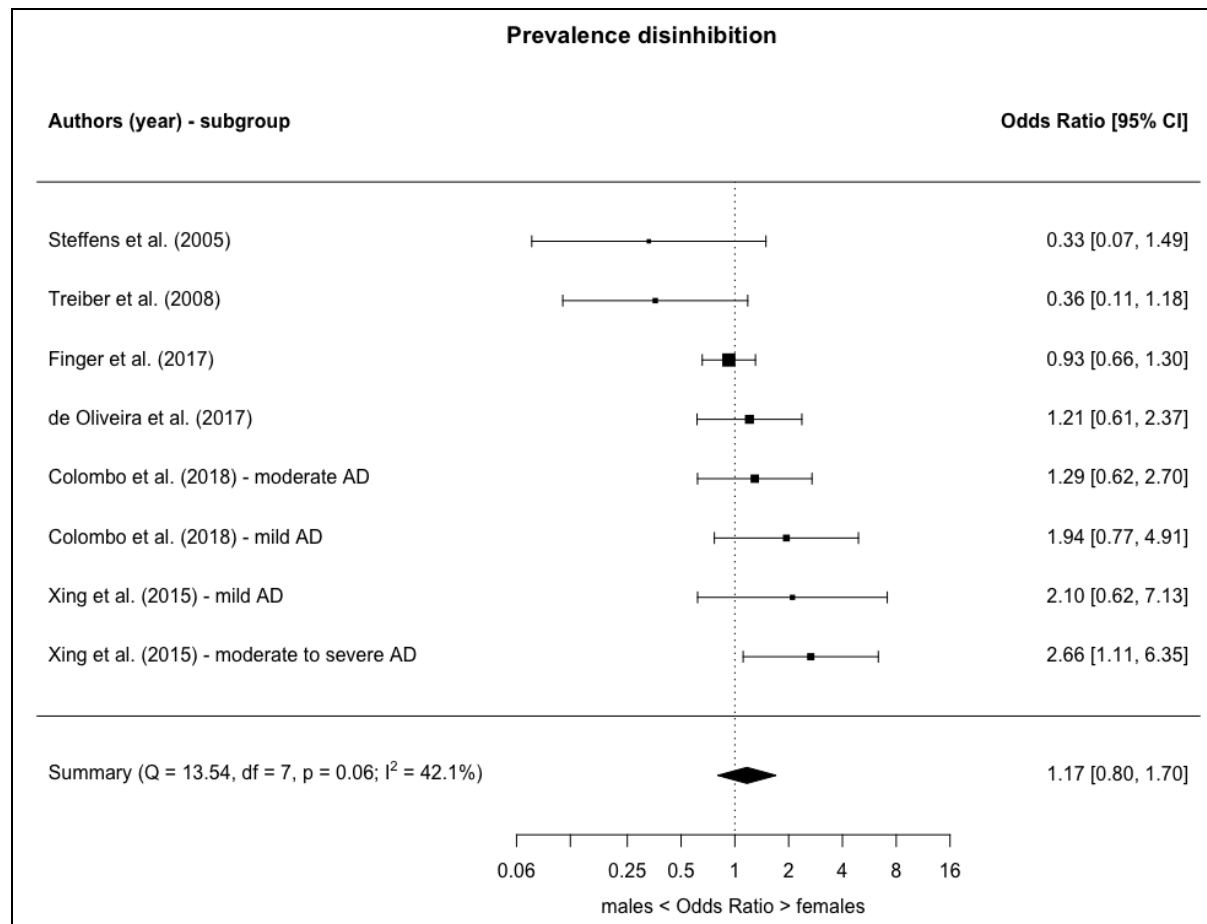

### E) Forest plot prevalence eating behavior

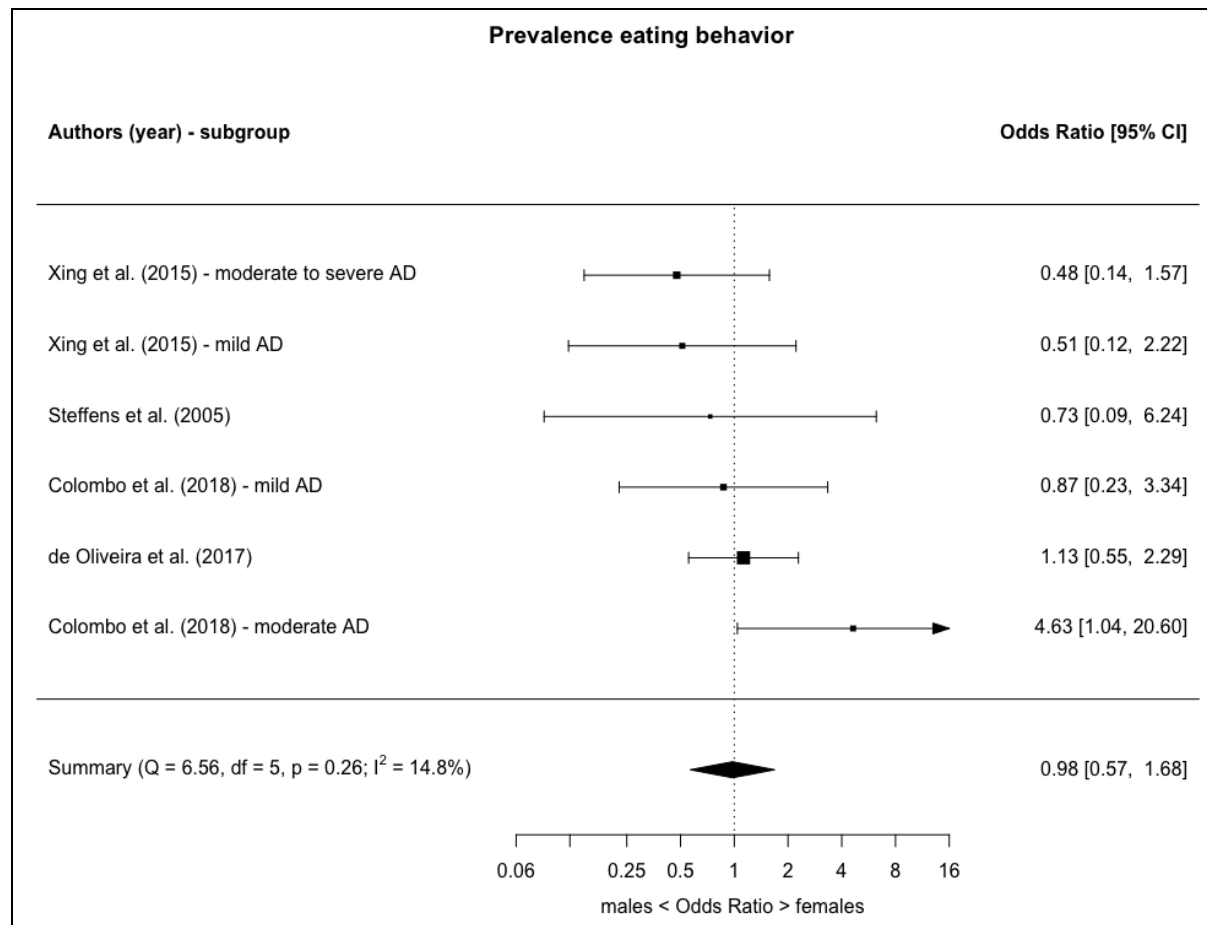



### F) Forest plot prevalence euphoria

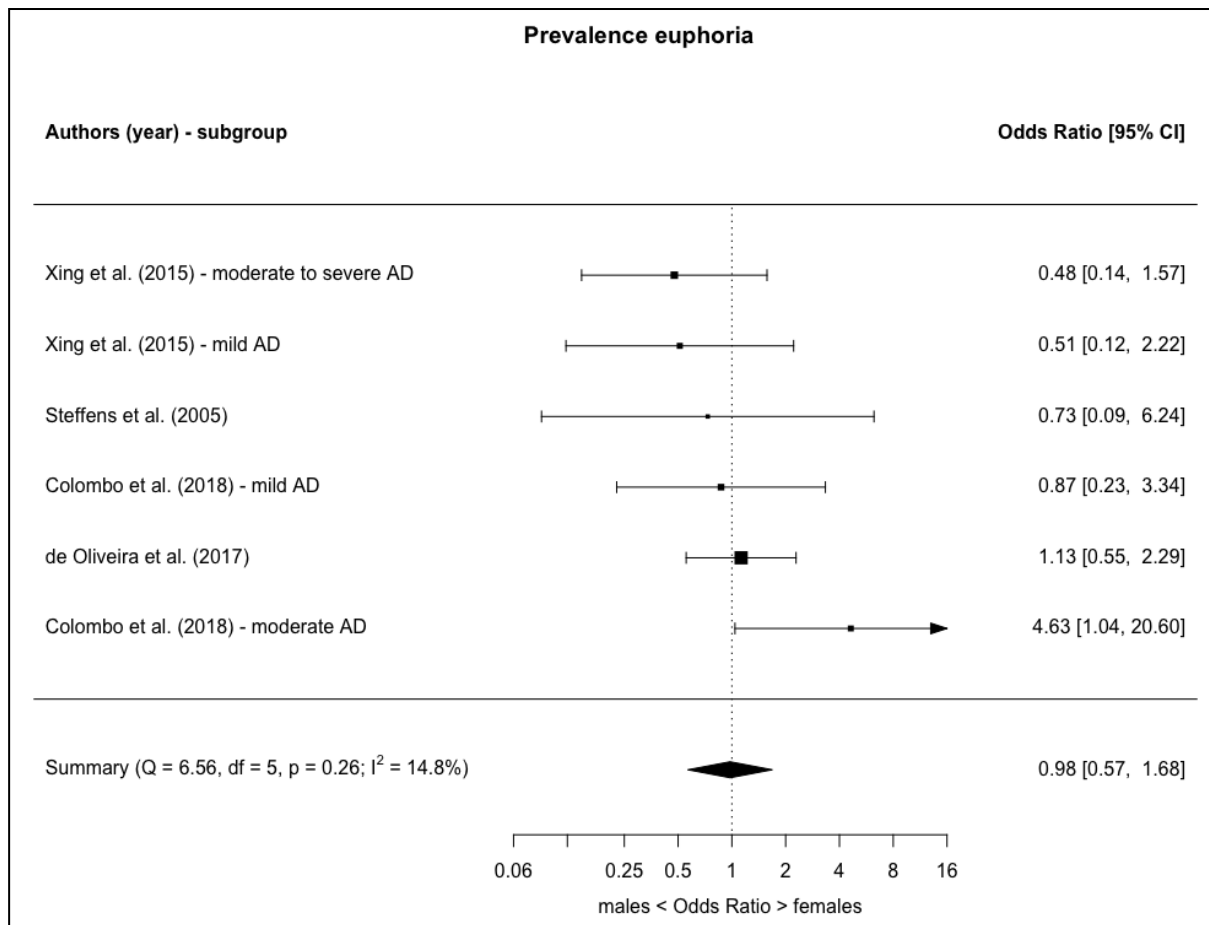

### G) Forest plot prevalence hallucinations

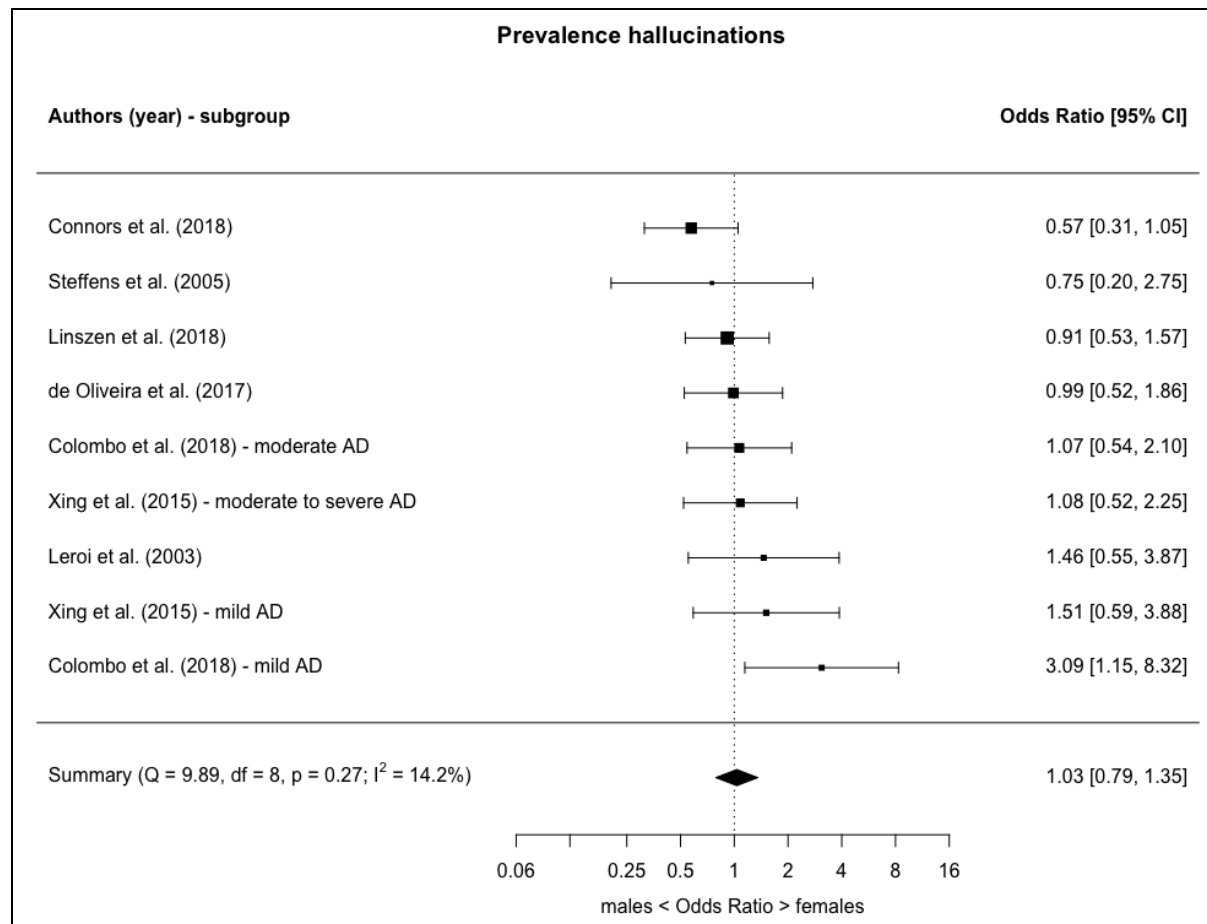

## H) Forest plot prevalence irritability

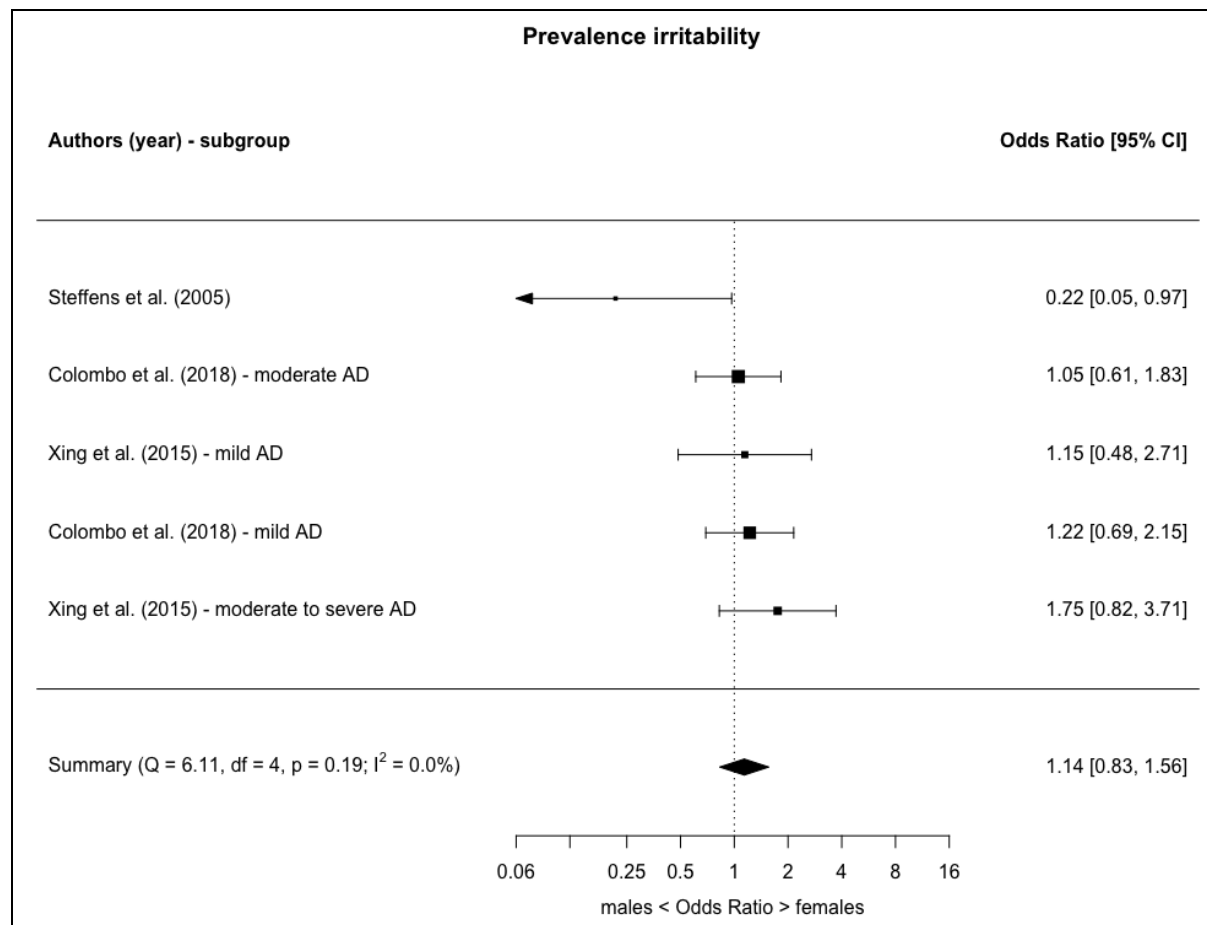

### I) Forest plot prevalence sleep disturbances

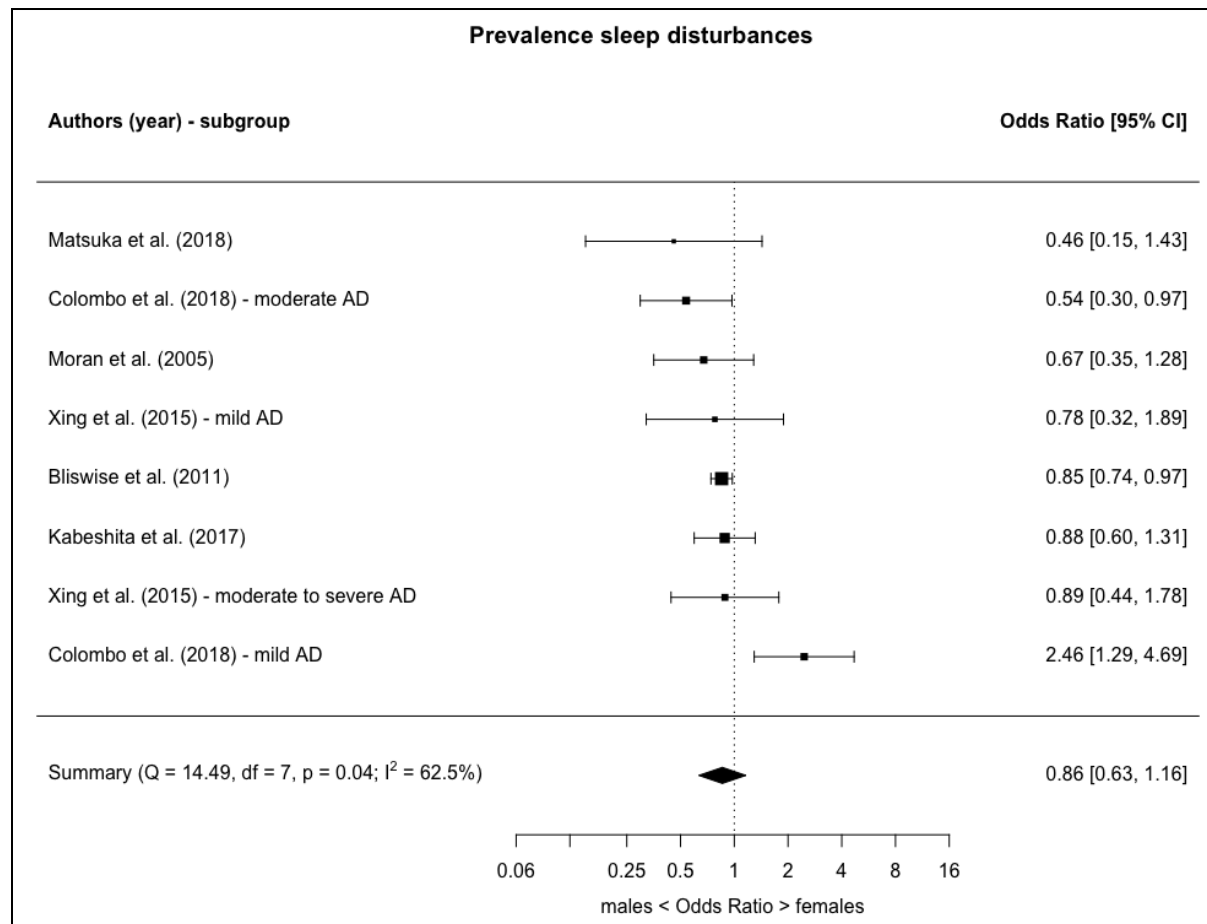

**eFigure 2. Forest plots meta-analyses severity specific NPS**

**A) Forest plot severity agitation**

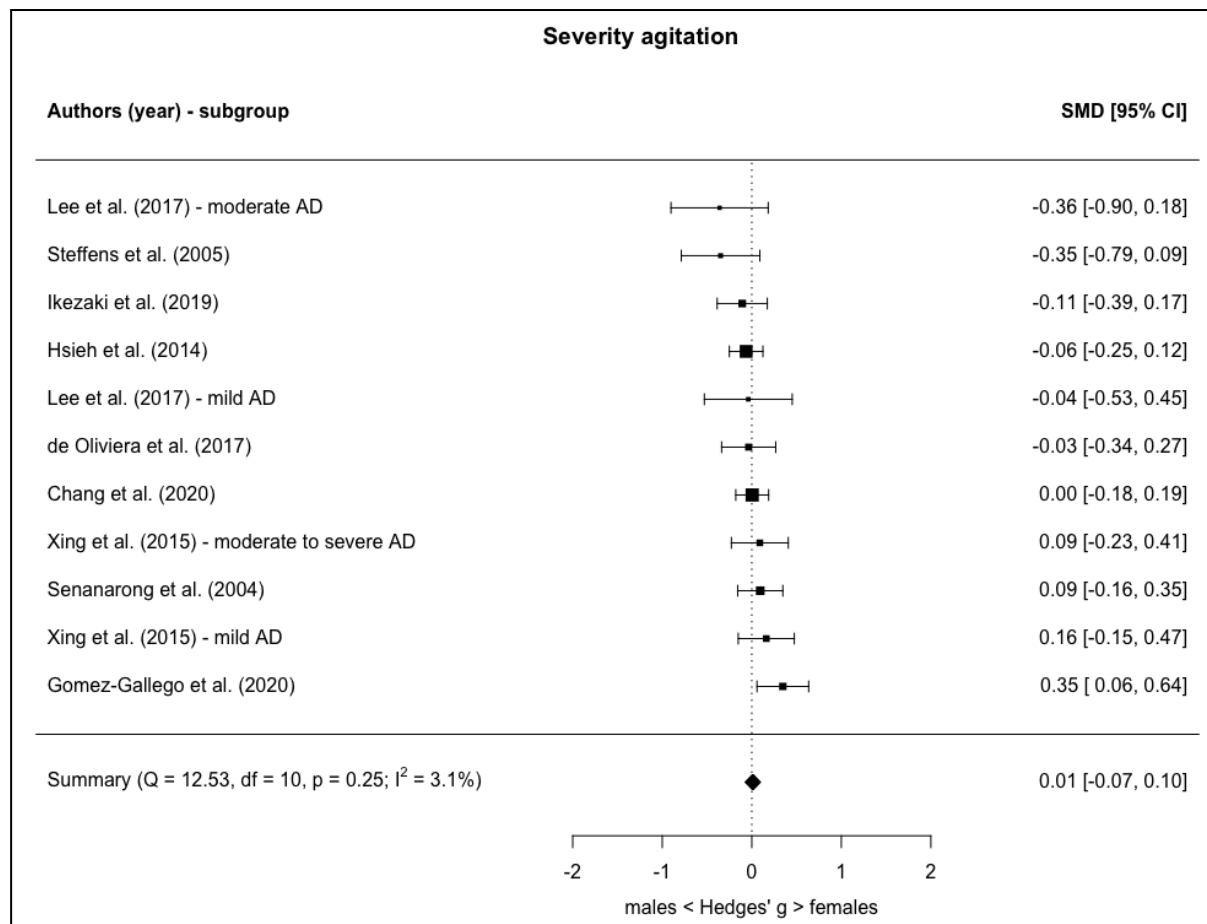

## B) Forest plot severity anxiety

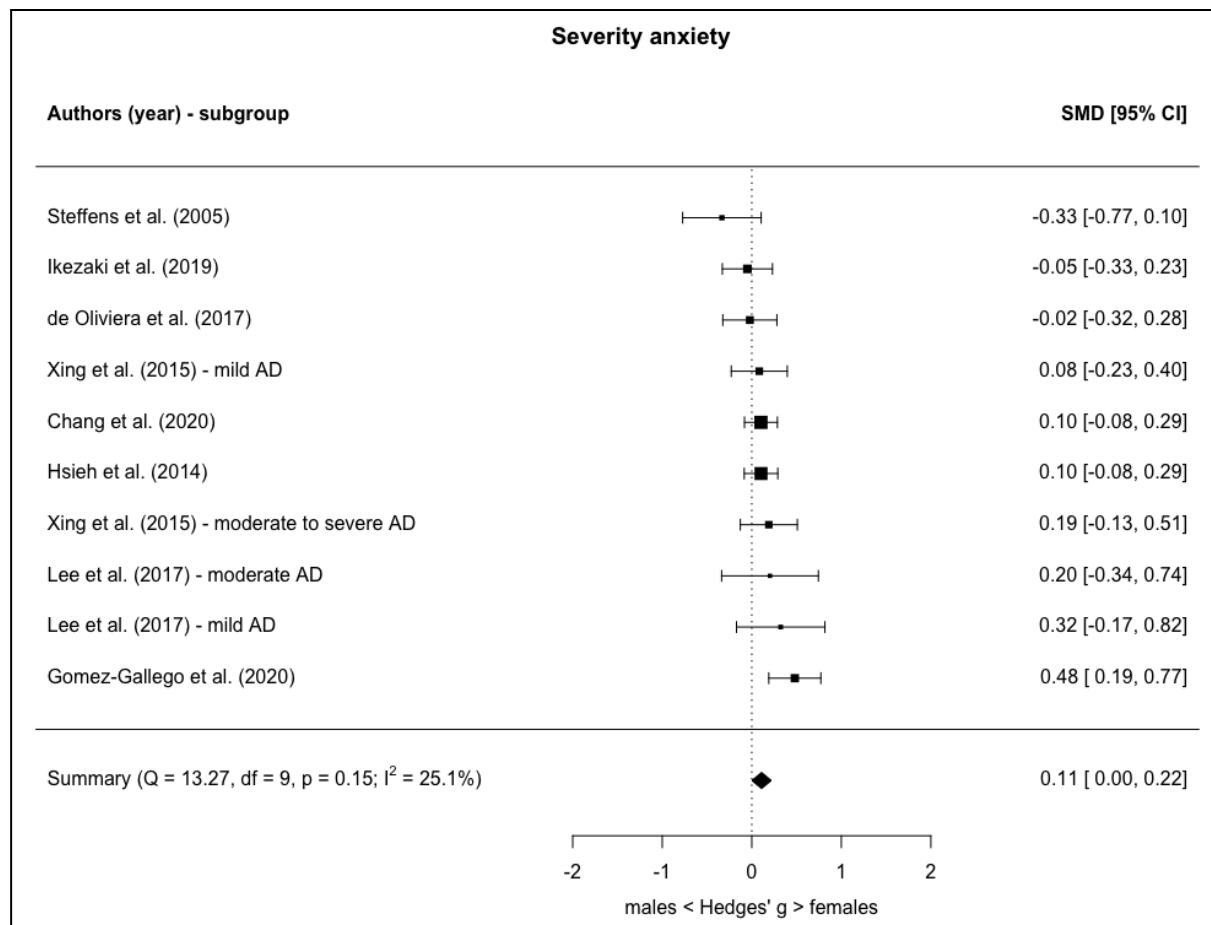

### C) Forest plot severity disinhibition

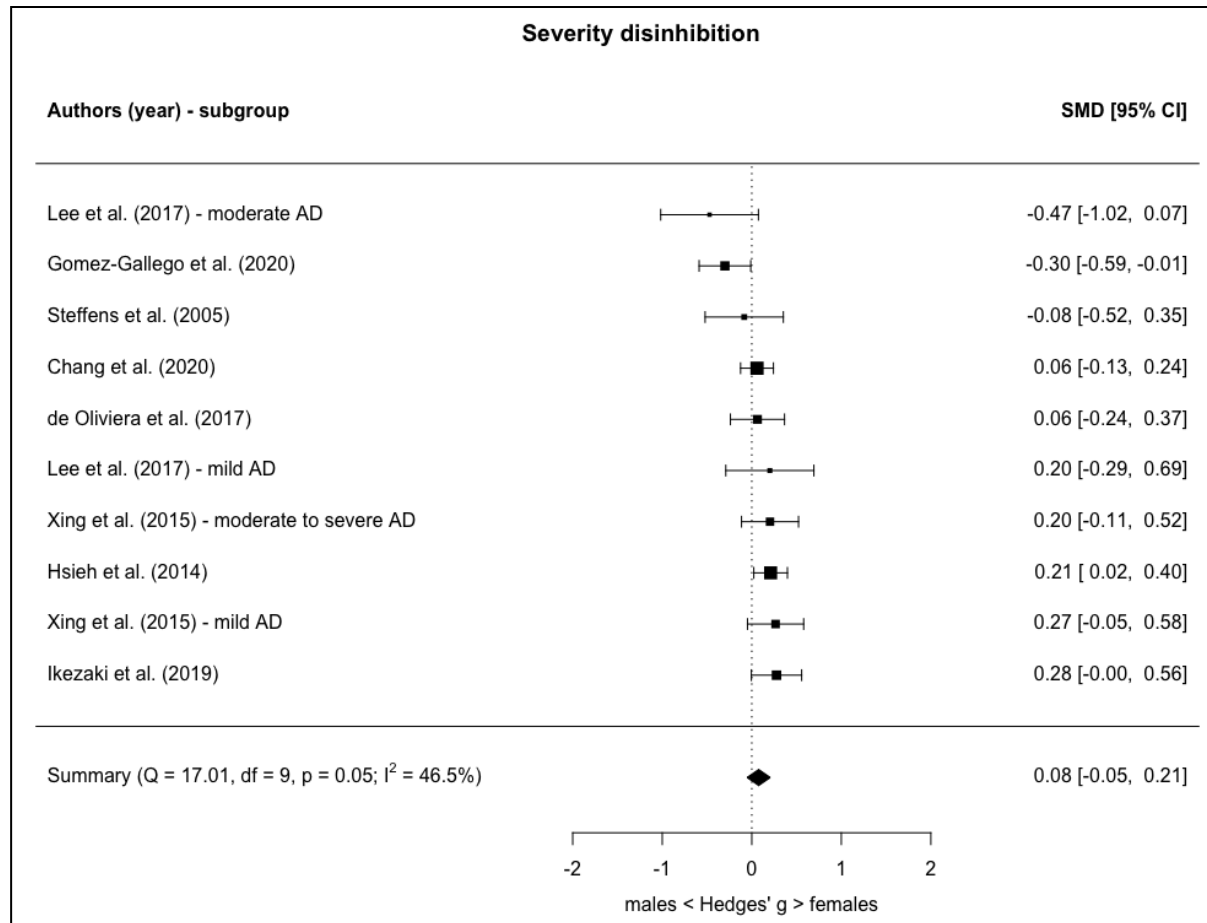

### D) Forest plot severity eating behavior

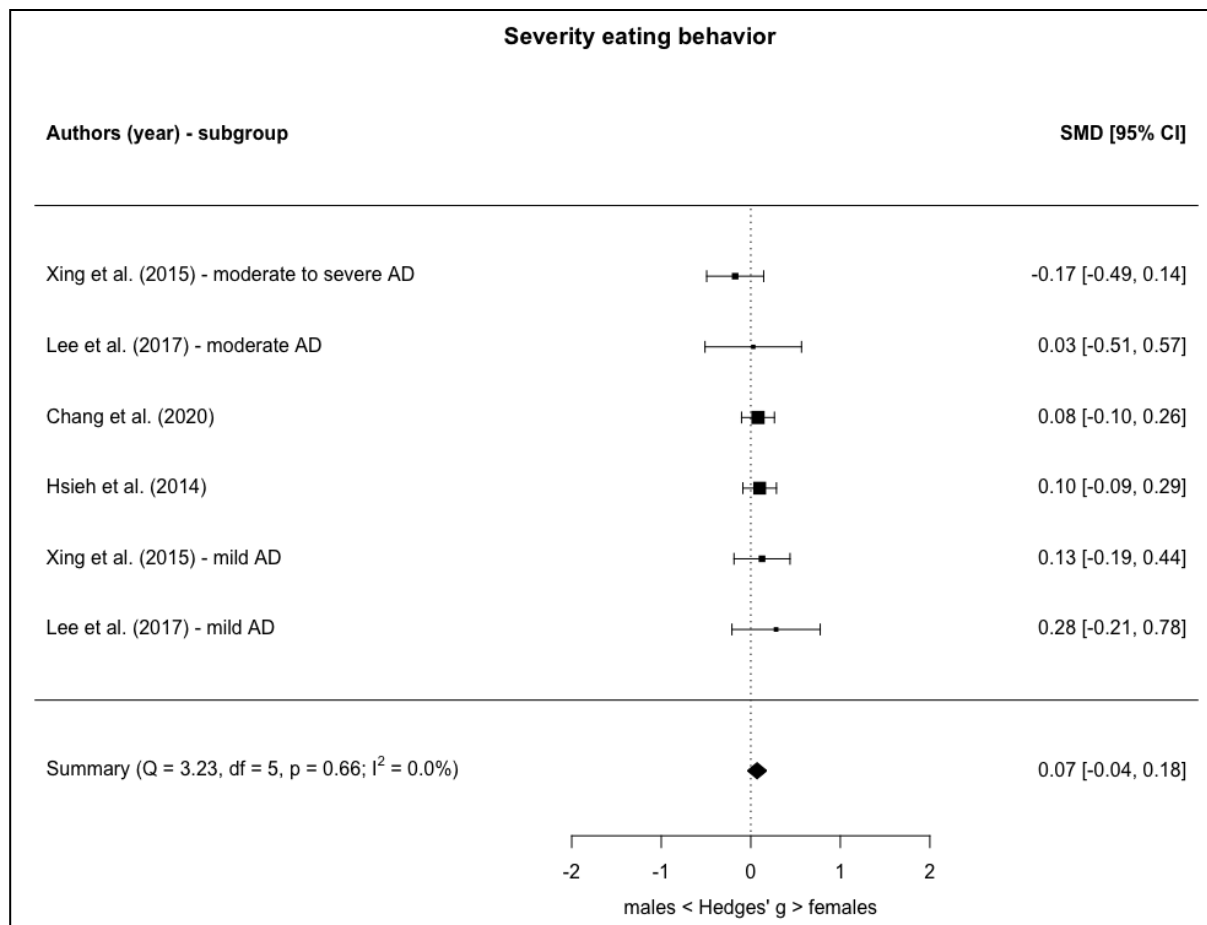



### E) Forest plot severity euphoria

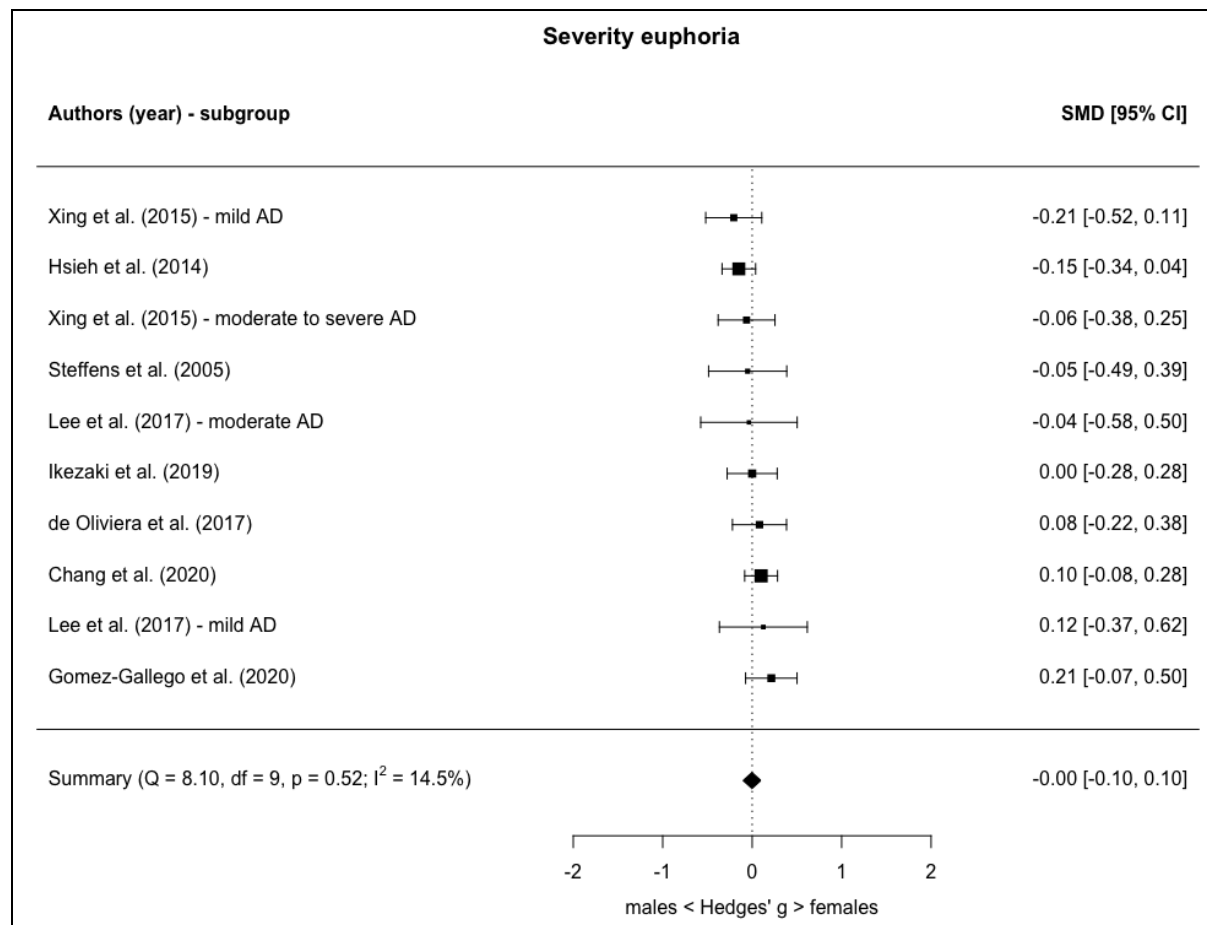

## F) Forest plot severity hallucinations

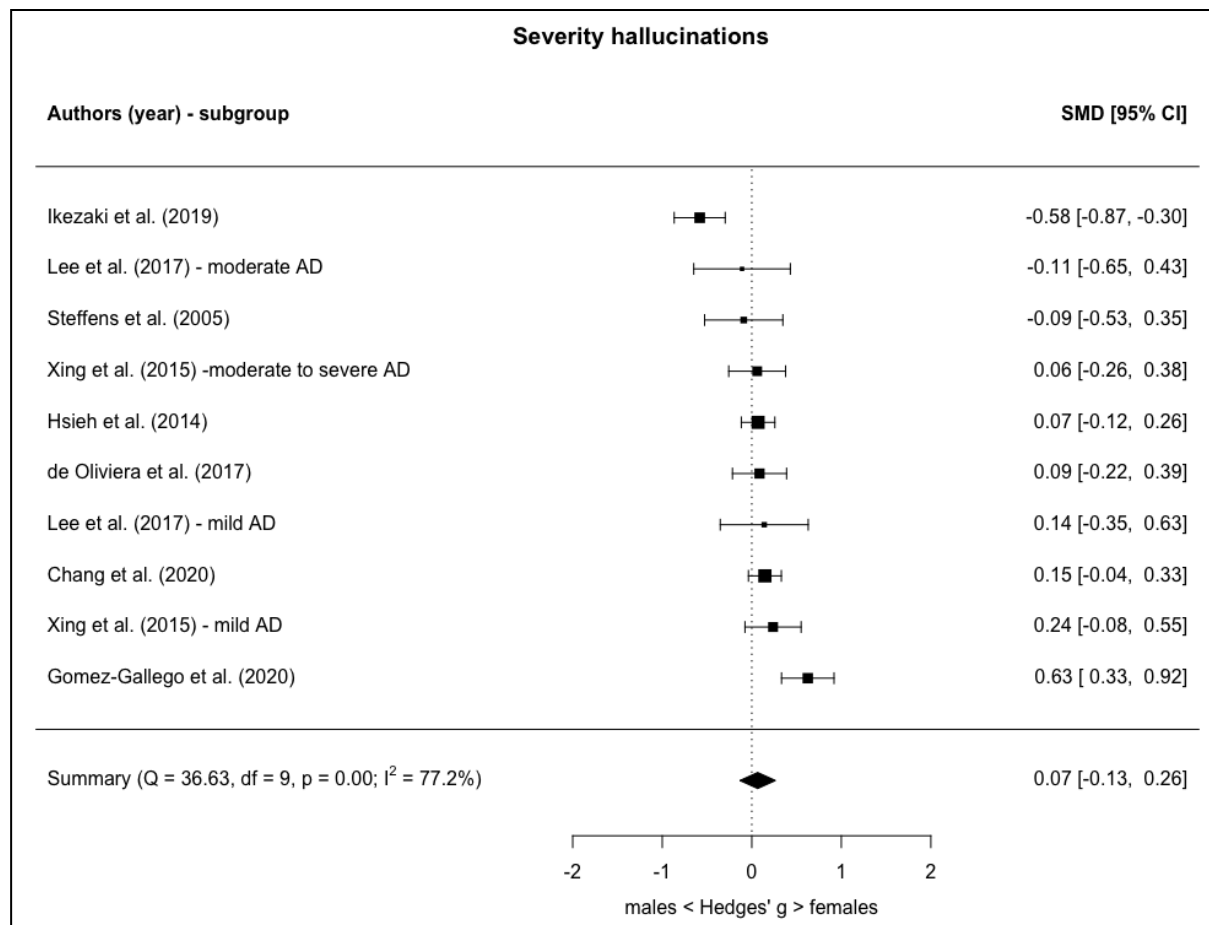

### G) Forest plot severity irritability

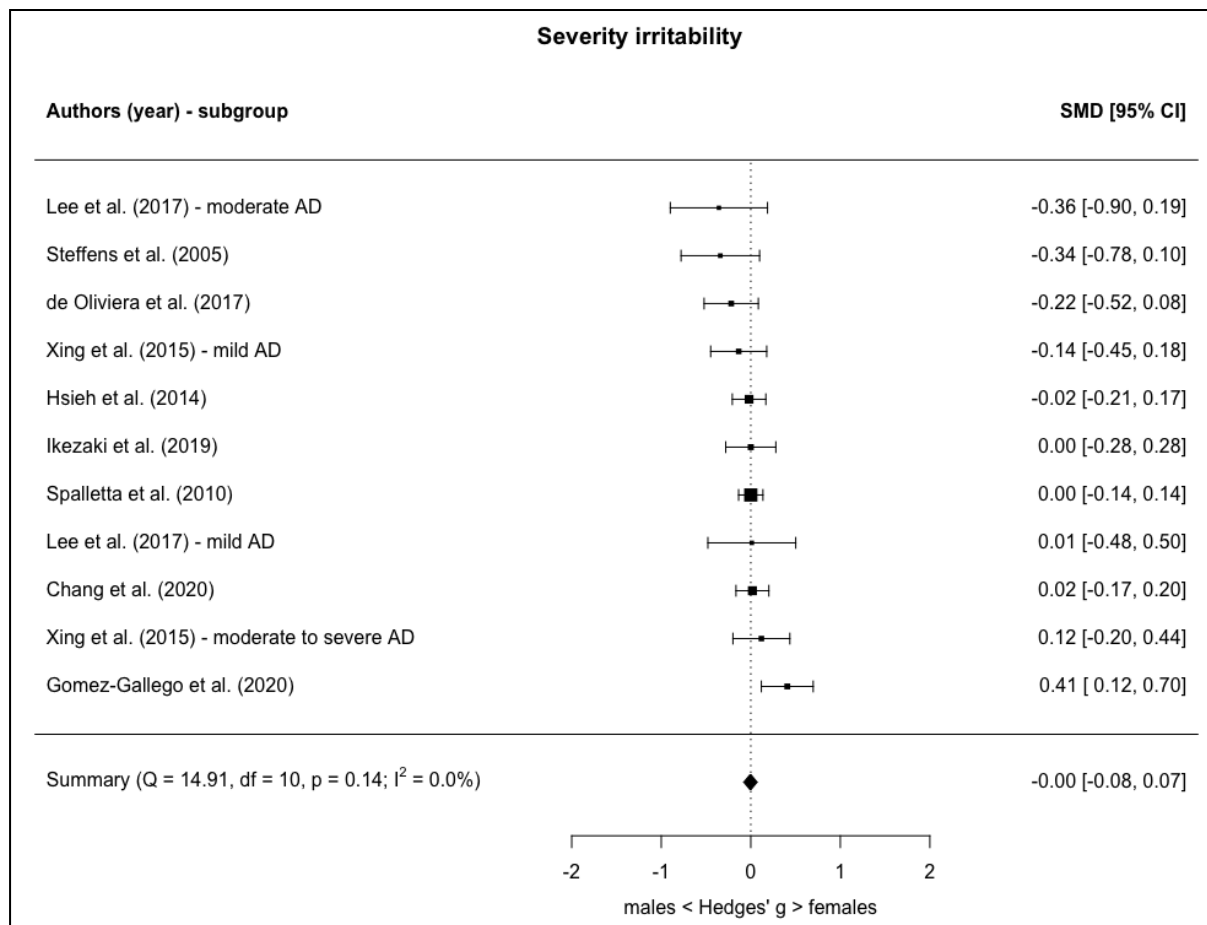

## H) Forest plot severity sleep disturbances

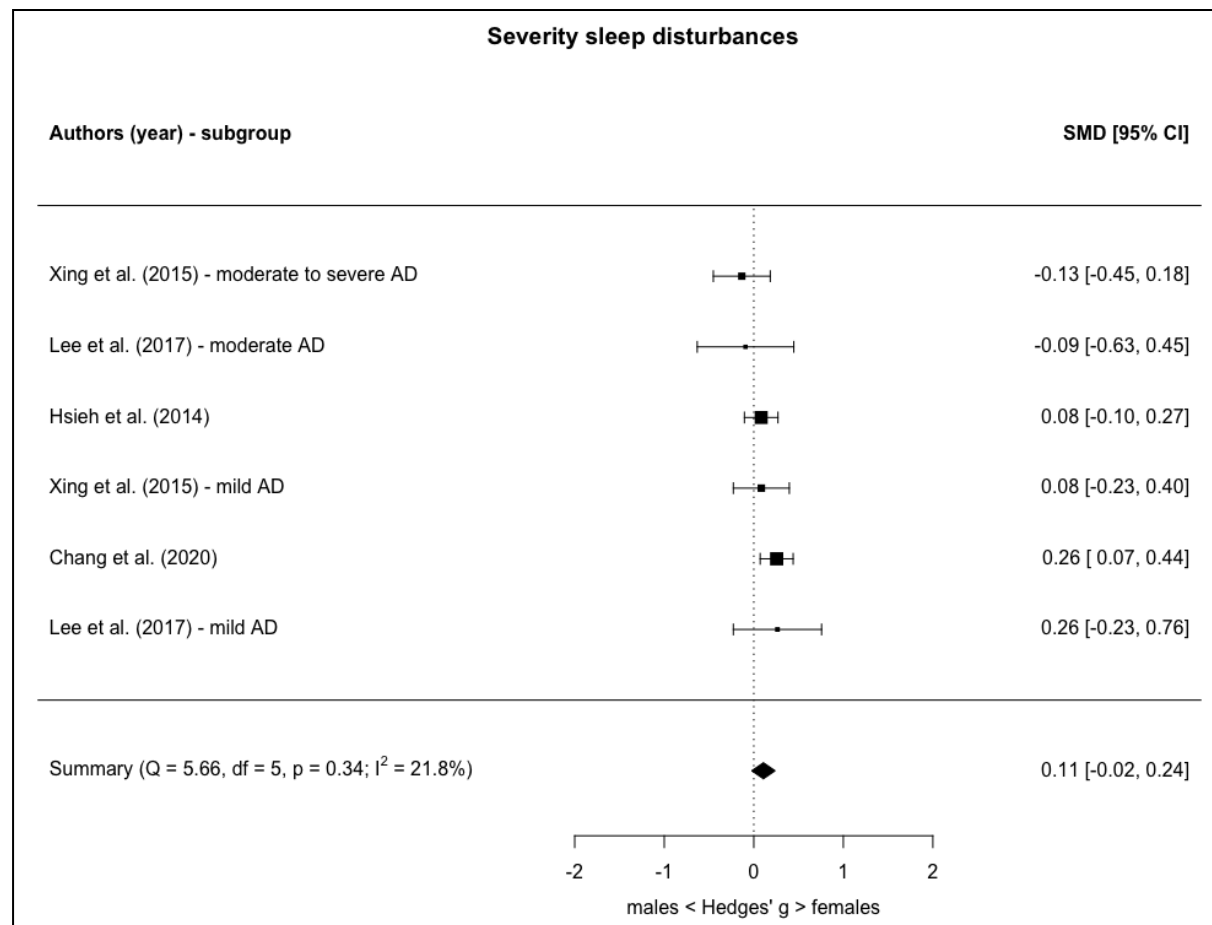

**eFigure 3. Funnel plots of meta-analyses specific NPS prevalence**

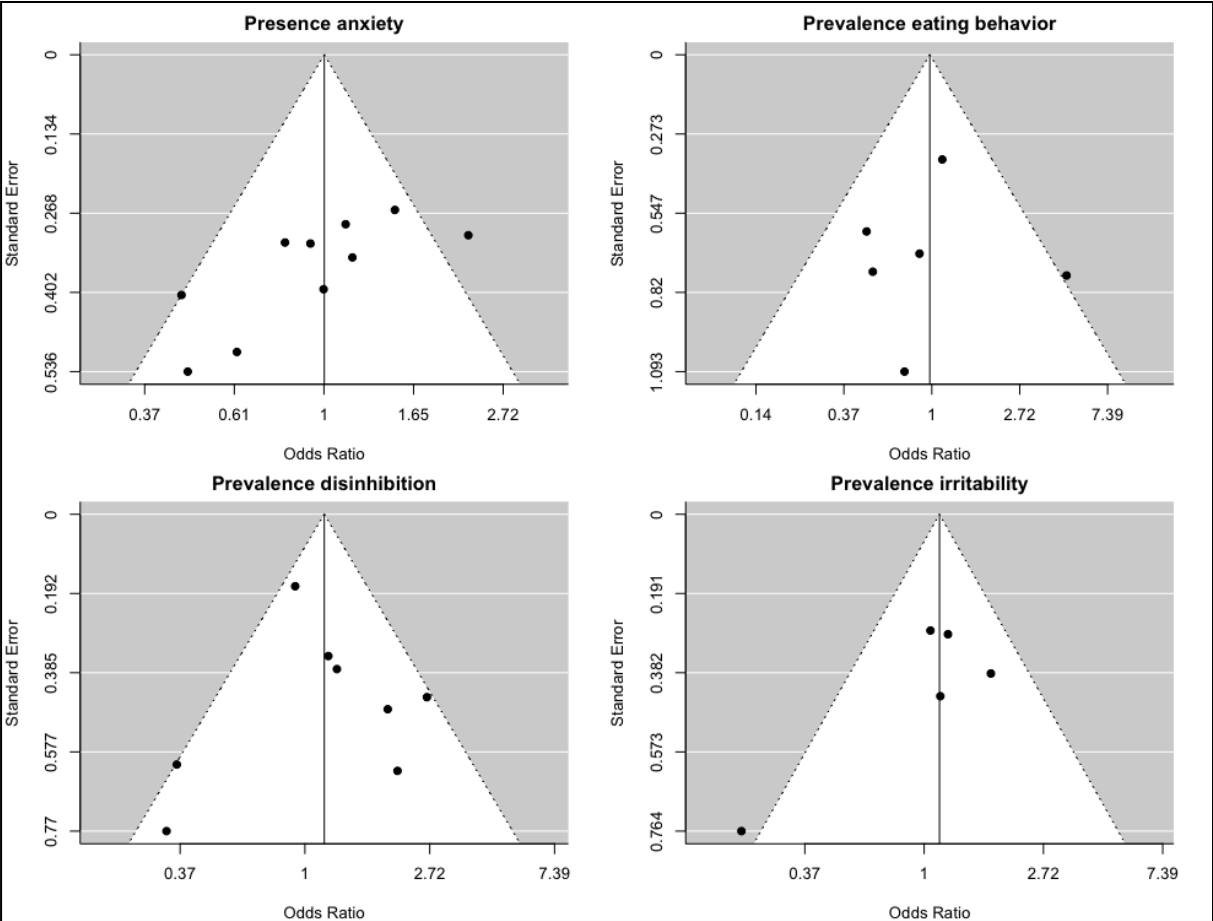

eFigure 3 (continued). Funnel plots of meta-analyses specific NPS prevalence

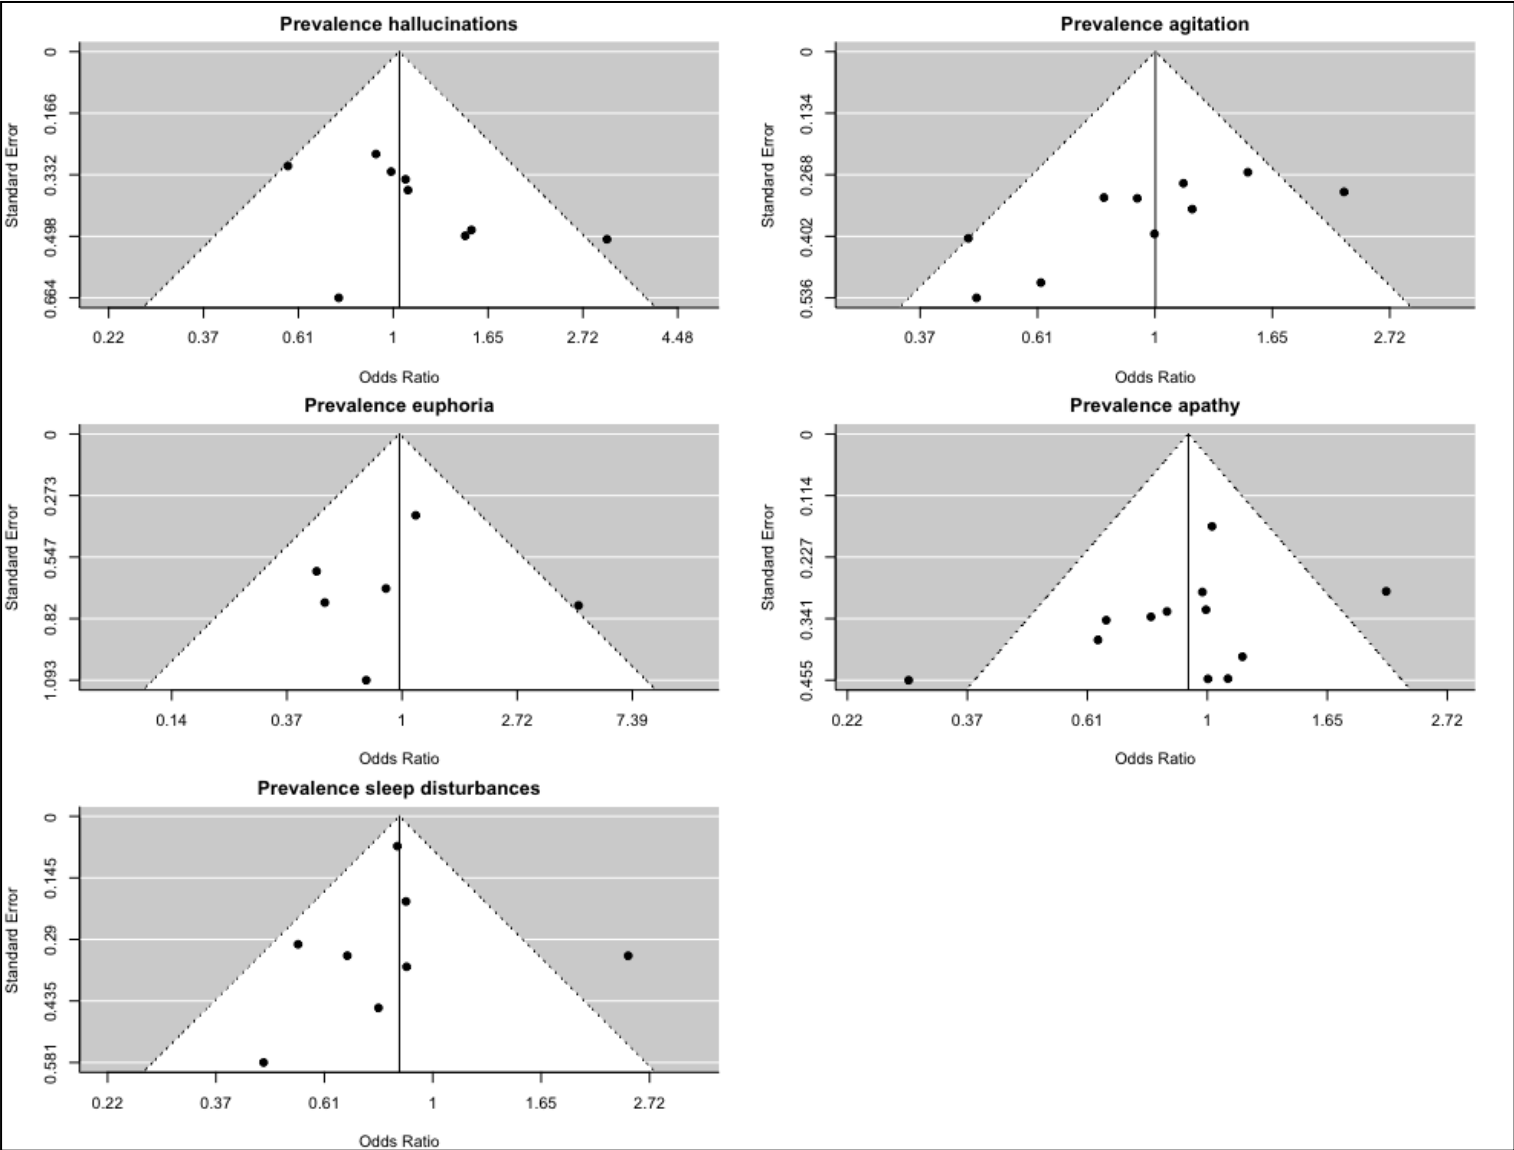

**eFigure 4. Funnel plots of meta-analyses specific NPS severity**

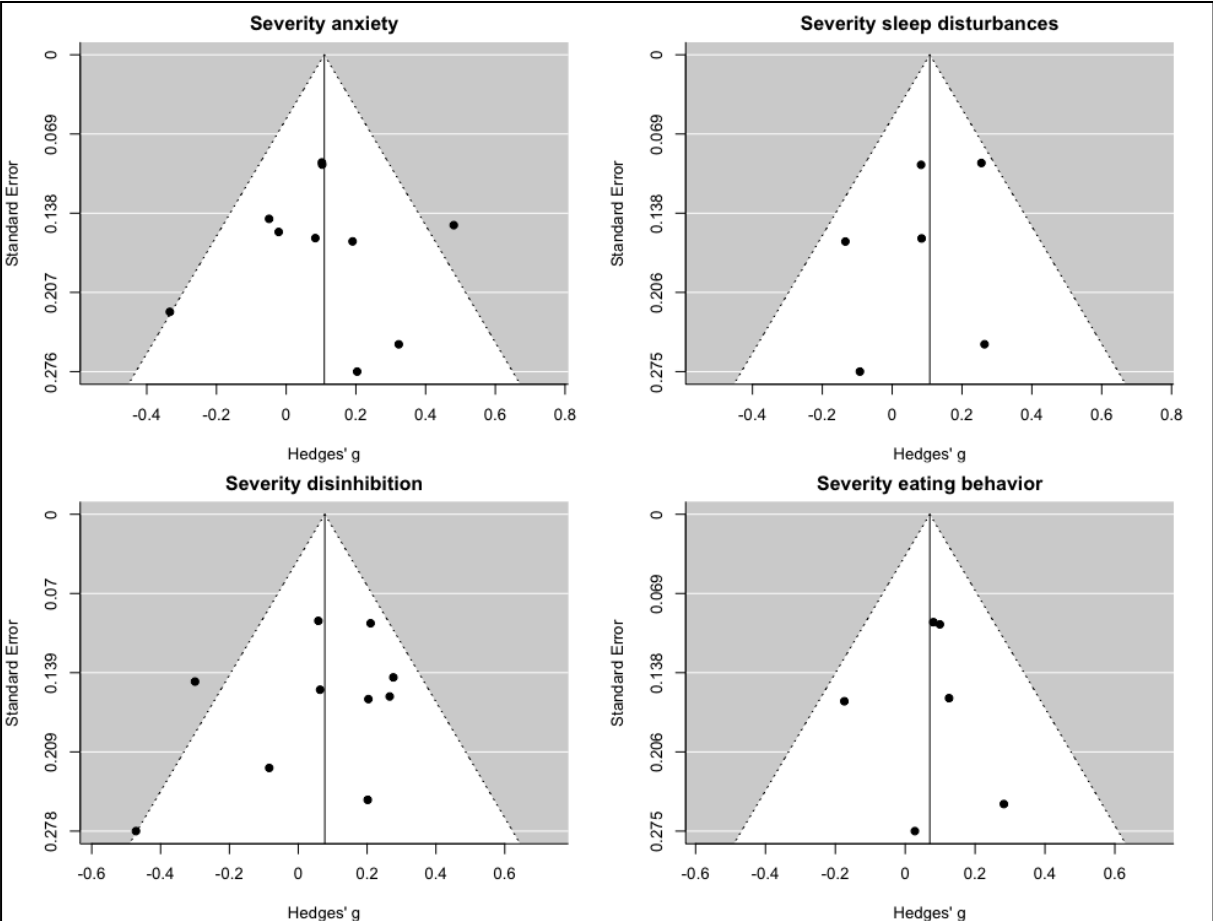

**eFigure 4 (continued). Funnel plots of meta-analyses specific NPS severity**

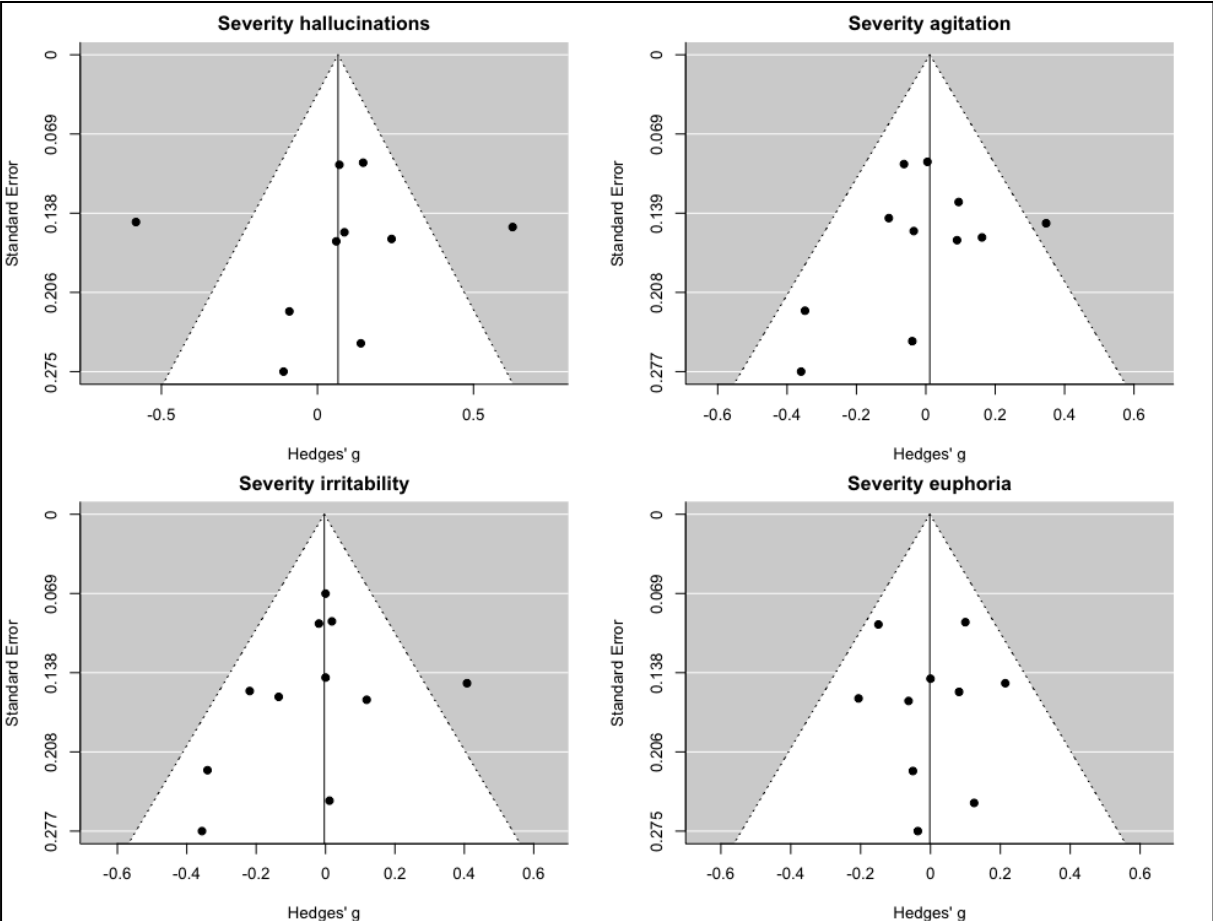



## eReferences

1. Alberici A, Bocchio L, Geroldi C, et al. Serum leptin levels are higher in females affected by frontotemporal lobar degeneration than Alzheimer's disease. *Journal of Neurology, Neurosurgery and Psychiatry* 2008;79:712-715.
2. Álvarez A, Aleixandre M, Linares C, Masliah E, Moessler H. Apathy and APOE4 are associated with reduced BDNF levels in Alzheimer's disease. *Journal of Alzheimer's Disease* 2014;42:1347-1355.
3. Benoit M, Andrieu S, Lechowski L, Gillette-Guyonnet S, Robert PH, Vellas B. Apathy and depression in Alzheimer's disease are associated with functional deficit and psychotropic prescription. *International Journal of Geriatric Psychiatry: A journal of the psychiatry of late life and allied sciences* 2008;23:409-414.
4. Bliwise DL, Mercaldo ND, Avidan AY, Boeve BF, Greer SA, Kukull WA. Sleep disturbance in dementia with Lewy bodies and Alzheimer's disease: a multicenter analysis. *Dementia and Geriatric Cognitive Disorders* 2011;31:239-246.
5. Burns A, Jacoby R, Levy R. Psychiatric phenomena in Alzheimer's disease. III: Disorders of mood. *The British Journal of Psychiatry* 1990;157:81-86.
6. Burns A, Jacoby R, Levy R. Psychiatric phenomena in Alzheimer's disease. IV: Disorders of behaviour. *The British journal of psychiatry* 1990;157:86-94.
7. Chang K-H, Huang C-C, Chen C-M, Wu H-C, Kuo H-C. Differences in Clinical Presentation of Behavioral and Psychological Symptoms of Dementia in Alzheimer's Disease According to Sex and Education Level. *Journal of Alzheimer's Disease* 2020:1-9.
8. Chareonboon T, Phanasathit M. Prevalence of neuropsychiatric symptoms in Alzheimer's disease: a cross-sectional descriptive study in Thailand. *Journal of the Medical Association of Thailand= Chotmaihet Thangphaet* 2014;97:560-565.
9. Chiu P-Y, Steffens D, Chen P-K, Hsu Y-C, Huang H-T, Lai T-J. Depression in Taiwanese patients with Alzheimer's disease determined by the National Institutes of Mental Health Provisional Criteria. *International Psychogeriatrics* 2012;24:1299.
10. Colombo D, Caltagirone C, Padovani A, et al. Gender differences in neuropsychiatric symptoms in mild to moderate alzheimer's disease patients undergoing switch of cholinesterase inhibitors: a post hoc analysis of the EVOLUTION study. *Journal of Women's Health* 2018;27:1368-1377.
11. Connors MH, Ames D, Woodward M, Brodaty H. Psychosis and clinical outcomes in Alzheimer disease: a longitudinal study. *The American Journal of Geriatric Psychiatry* 2018;26:304-313.
12. Del Prete M, Spaccavento S, Craca A, Fiore P, Angelelli P. Neuropsychiatric symptoms and the APOE genotype in Alzheimer's disease. *Neurological Sciences* 2009;30:367-373.
13. Delano-Wood L, Houston WS, Emond JA, et al. APOE genotype predicts depression in women with Alzheimer's disease: a retrospective study. *International Journal of Geriatric Psychiatry* 2008;23:632-636.
14. Derouesné C, Guigot J, Chermat V, Winchester N, Lacomblez L. Sexual behavioral changes in Alzheimer disease. *Alzheimer Disease and Associated Disorders* 1996;10:86-92.
15. Eustace A, Kidd N, Greene E, et al. Verbal aggression in Alzheimer's disease. Clinical, functional and neuropsychological correlates. *International Journal of Geriatric Psychiatry* 2001;16:858-861.
16. Finger E, Zhang J, Dickerson B, Bureau Y, Masellis M. Disinhibition in Alzheimer's disease is associated with reduced right frontal pole cortical thickness. *Journal of Alzheimer's Disease* 2017;60:1161-1170.
17. Gomez-Gallego M, Gallego-Mellado M, Gómez-Gallego JC, Gómez-García JG. Sex Moderates the Relationship of Stress and Perceived Social Support With Neuropsychological Symptoms Among Community-dwelling Persons With Alzheimer Disease in Spain. *Alzheimer Disease and Associated Disorders* 2020.
18. Gormley N, Rizwan MR, Lovestone S. Clinical predictors of aggressive behaviour in Alzheimer's disease. *International Journal of Geriatric Psychiatry* 1998;13:109-115.
19. Gormley N, Rizwan MR. Prevalence and clinical correlates of psychotic symptoms in Alzheimer's disease. *International Journal of Geriatric Psychiatry* 1998;13:410-414.
20. Hall JR, Wiechmann AR, Johnson LA, et al. Total cholesterol and neuropsychiatric symptoms in Alzheimer's disease: The impact of total cholesterol level and gender. *Dementia and Geriatric Cognitive Disorders* 2014;38:300-309.
21. Ikezaki H, Hashimoto M, Ishikawa T, et al. Relationship between executive dysfunction and neuropsychiatric symptoms and impaired instrumental activities of daily living among patients with very mild Alzheimer's disease. *International Journal of Geriatric Psychiatry* 2020;35:877-887.
22. Hsieh S-W, Chen C-H, Huang L-C, Chang Y-H, Yang Y-H. Gender differences in presentation of behavioral and psychological symptoms in Alzheimer's disease in Taiwan. *Aging & Mental Health* 2020;24:1342-1347.
23. Kabeshita Y, Adachi H, Matsushita M, et al. Sleep disturbances are key symptoms of very early stage Alzheimer disease with behavioral and psychological symptoms: a Japan multi-center cross-sectional study (J-BIRD). *International Journal of Geriatric Psychiatry* 2017;32:222-230.

24. Kaiser NC, Liang L-J, Melrose RJ, Wilkins SS, Sultzer DL, Mendez MF. Differences in anxiety among patients with early-versus late-onset Alzheimer's disease. *The Journal of neuropsychiatry and clinical neurosciences* 2014;26:73-80.
25. Karttunen K, Karppi P, Hiltunen A, et al. Neuropsychiatric symptoms and quality of life in patients with very mild and mild Alzheimer's disease. *International Journal of Geriatric Psychiatry* 2011;26:473-482.
26. Kaufer DI, Cummings JL, Christine D, et al. Assessing the impact of neuropsychiatric symptoms in Alzheimer's disease: the Neuropsychiatric Inventory Caregiver Distress Scale. *Journal of the American Geriatrics Society* 1998;46:210-215.
27. Kwak YT, Yang Y, Kwak SG, Koo MS. Delusions of Korean patients with Alzheimer's disease: Study of drug-naïve patients. *Geriatrics & gerontology international* 2013;13:307-313.
28. Landes AM, Sperry SD, Strauss ME. Prevalence of apathy, dysphoria, and depression in relation to dementia severity in Alzheimer's disease. *The Journal of neuropsychiatry and clinical neurosciences* 2005;17:342-349.
29. Lee J, Lee KJ, Kim H. Gender differences in behavioral and psychological symptoms of patients with Alzheimer's disease. *Asian Journal of Psychiatry* 2017;26:124-128.
30. Leroi I, Voulgari A, Breitner JC, Lyketsos CG. The epidemiology of psychosis in dementia. *American Journal of Geriatric Psychiatry* 2003;11:83-91.
31. Levy ML, Cummings JL, Fairbanks LA, Bravi D, Calvani M, Carta A. Longitudinal assessment of symptoms of depression, agitation, and psychosis in 181 patients with Alzheimer's disease. *The American journal of psychiatry* 1996;153:1438-1443.
32. Linszen MMJ, Lemstra AW, Dauwan M, Brouwer RM, Scheltens P, Sommer IEC. Understanding hallucinations in probable Alzheimer's disease: Very low prevalence rates in a tertiary memory clinic. *Alzheimer's & dementia (Amsterdam, Netherlands)* 2018;10:358-362.
33. Liu CY, Fuh JL, Teng EL, et al. Depressive disorders in Chinese patients with Alzheimer's disease. *Acta Psychiatrica Scandinavica* 1999;100:451-455.
34. Matsuoka T, Imai A, Fujimoto H, et al. Neural correlates of sleep disturbance in Alzheimer's disease: Role of the precuneus in sleep disturbance. *Journal of Alzheimer's Disease* 2018;63:957-964.
35. Migliorelli R, Teson A, Sabe L, Petracchi M, Leiguarda R, Starkstein SE. Prevalence and correlates of dysthymia and major depression among patients with Alzheimer's disease. *The American journal of psychiatry* 1995.
36. Moran M, Lynch CA, Walsh C, Coen R, Coakley D, Lawlor BA. Sleep disturbance in mild to moderate Alzheimer's disease. *Sleep Medicine* 2005;6:347-352.
37. Moran EK, Becker JA, Satlin A, Lyoo IK, Fischman AJ, Johnson KA. Psychosis of Alzheimer's disease: Gender differences in regional perfusion. *Neurobiology of Aging* 2008;29:1218-1225.
38. Müller-Thomsen T, Arlt S, Ganzer S, et al. Depression in Alzheimer's disease might be associated with apolipoprotein E ε4 allele frequency in women but not in men. *Dementia and Geriatric Cognitive Disorders* 2002;14:59-63.
39. Mulin E, Leone E, Dujardin K, et al. Diagnostic criteria for apathy in clinical practice. *International Journal of Geriatric Psychiatry* 2011;26:158-165.
40. Oliveira FF, Chen ES, Smith MC, Bertolucci PH. Associations of cerebrovascular metabolism genotypes with neuropsychiatric symptoms and age at onset of Alzheimer's disease dementia. *Braz J Psychiatry* 2017;39:95-103.
41. Ott BR, Tate CA, Gordon NM, Heindel WC. Gender differences in the behavioral manifestations of Alzheimer's disease. *Journal of the American Geriatrics Society* 1996;44:583-587.
42. Porta-Etessam J, Tobaruela-González JL, Rabes-Berendes C. Depression in patients with moderate Alzheimer disease: a prospective observational cohort study. *Alzheimer Disease and Associated Disorders* 2011;25:317-325.
43. Pusswald G, Lehrner J, Hagmann M, et al. Gender-Specific Differences in Cognitive Profiles of Patients with Alzheimer's Disease: Results of the Prospective Dementia Registry Austria (PRODEM-Austria). *Journal of Alzheimer's disease : JAD* 2015;46:631-637.
44. Rozzini L, Chilovi BV, Bertolotti E, Trabucchi M, Padovani A. Acetylcholinesterase inhibitors and depressive symptoms in patients with mild to moderate Alzheimer's disease. *Aging Clinical and Experimental Research* 2007;19:220-223.
45. Shi Q, Zhou F, Mei J, Yang H, Li H. The Effect of Type 2 Diabetes Mellitus on Neuropsychological Symptoms in Chinese Early Alzheimer's Disease Population. *Neuropsychiatric Disease and Treatment* 2020;16:829.
46. Senanarong V, Cummings JL, Fairbanks L, et al. Agitation in Alzheimer's disease is a manifestation of frontal lobe dysfunction. *Dementia and Geriatric Cognitive Disorders* 2004;17:14-20.
47. Sinforiani E, Citterio A, Zucchella C, et al. Impact of gender differences on the outcome of Alzheimer's disease. *Dementia and Geriatric Cognitive Disorders* 2010;30:147-154.

48. Slifer MA, Martin ER, Gilbert JR, Haines JL, Pericak-Vance MA. Resolving the relationship between ApolipoproteinE and depression. *Neuroscience Letters* 2009;455:116-119.
49. Spalletta G, Musicco M, Padovani A, et al. Neuropsychiatric symptoms and syndromes in a large cohort of newly diagnosed, untreated patients with Alzheimer disease. *The American Journal of Geriatric Psychiatry* 2010;18:1026-1035.
50. Steffens DC, Maytan M, Helms MJ, Plassman BL. Prevalence and clinical correlates of neuropsychiatric symptoms in dementia. *American Journal of Alzheimer's Disease & Other Dementias* 2005;20:367-373.
51. Suma S, Watanabe Y, Hirano H, et al. Factors affecting the appetites of persons with Alzheimer's disease and mild cognitive impairment. *Geriatrics & gerontology international* 2018;18:1236-1243.
52. Toyota Y, Ikeda M, Shinagawa S, et al. Comparison of behavioral and psychological symptoms in early-onset and late-onset Alzheimer's disease. *International Journal of Geriatric Psychiatry: A journal of the psychiatry of late life and allied sciences* 2007;22:896-901.
53. Treiber KA, Lyketsos CG, Corcoran C, et al. Vascular factors and risk for neuropsychiatric symptoms in Alzheimer's disease: the Cache County Study. *International psychogeriatrics/IPA* 2008;20:538.
54. Troisi A, Pasini A, Gori G, Sorbi T, Baroni A, Ciani N. Clinical predictors of somatic and psychological symptoms of depression in Alzheimer's disease. *International Journal of Geriatric Psychiatry* 1996;11:23-27.
55. Tunnard C, Whitehead D, Hurt C, et al. Apathy and cortical atrophy in Alzheimer's disease. *International Journal of Geriatric Psychiatry* 2011;26:741-748.
56. Usman S, Chaudhary HR, Asif A, Yahya MI. Severity and risk factors of depression in Alzheimer's disease. *Journal of the College of Physicians and Surgeons--Pakistan* 2010;20:327-330.
57. Vilalta-Franch J, López-Pousa S, Calvó-Perxas L, Garre-Olmo J. Psychosis of Alzheimer disease: prevalence, incidence, persistence, risk factors, and mortality. *The American Journal of Geriatric Psychiatry* 2013;21:1135-1143.
58. Xing Y, Tang Y, Jia J. Sex differences in neuropsychiatric symptoms of Alzheimer's disease: the modifying effect of apolipoprotein E  $\epsilon$ 4 status. *Behavioural Neurology* 2015;2015.
59. Yang B, Yu H, Xing M, He R, Liang R, Zhou L. The relationship between cognition and depressive symptoms, and factors modifying this association, in Alzheimer's disease: A multivariate multilevel model. *Archives of Gerontology and Geriatrics* 2017;72:25-31.
60. Yang H, Hong W, Chen L, Tao Y, Peng Z, Zhou H. Analysis of risk factors for depression in Alzheimer's disease patients. *International Journal of Neuroscience* 2020;130:1136-1141.
61. Zeitzer JM, David R, Friedman L, et al. Phenotyping apathy in individuals with Alzheimer disease using functional principal component analysis. *The American Journal of Geriatric Psychiatry* 2013;21:391-397.
62. Zhao H, Zhao Z, Huang L, Preter M. Diagnosis and assessment of apathy in Chinese patients with Alzheimer's disease. *Journal of Psychosomatic Research* 2012;72:405-407.
